# Supplementary material for: Mechanistic insights on CO2 utilization using sustainable catalysis
Source: Royal Society of Chemistry journal article supplement (doi:10.1039/d1nj04757d), 2021-01-01
Supplement: d1nj04757d1.pdf [file d1nj04757d1.pdf]

## Mechanistic Insights on CO<sub>2</sub> Utilization using Sustainable Catalysis

Abdussalam K. Qaroush,<sup>\*a</sup> Areej K. Hasan,<sup>a</sup> Suhad B. Hammad,<sup>a</sup> Feda'a M. Al-Qaisi,<sup>b</sup> Khaleel I. Assaf,<sup>c</sup> Fatima Alsoubani<sup>b</sup> and Ala'a F. Eftaiha<sup>\*b</sup>

<sup>a</sup> Department of Chemistry, Faculty of Science, The University of Jordan, Amman 11942, Jordan.

<sup>b</sup> Department of Chemistry, Faculty of Science, The Hashemite University, P.O. Box 330127, Zarqa 13133, Jordan.

<sup>c</sup> Department of Chemistry, Faculty of Science, Al-Balqa Applied University, 19117 Al-Salt, Jordan.

### *Supporting Information*

|                                                                                                                                                                                                         |    |
|---------------------------------------------------------------------------------------------------------------------------------------------------------------------------------------------------------|----|
| <b>Table S1.</b> Elemental analysis for each caffeine adduct. ....                                                                                                                                      | 5  |
| <b>Figure S1.</b> A. <sup>1</sup> H NMR spectra of the parent CAF molecule and its bromide adduct in DMSO- <i>d</i> <sub>6</sub> , B. ATR-FTIR spectra of CAF (red trace) and CAFH•Br (blue trace)..... | 5  |
| <b>Figure S2.</b> <sup>1</sup> H NMR spectra of caffeine salts dissolved in DMSO- <i>d</i> <sub>6</sub> . ....                                                                                          | 6  |
| <b>Figure S3.</b> The TGA traces of the caffeine adducts. ....                                                                                                                                          | 6  |
| <b>Figure S4.</b> ATR-FTIR spectra of CAF (red trace), CAFH•Br (dark blue trace), CAFH•Cl (green trace), and CAFH•I (violet trace).....                                                                 | 7  |
| <b>Figure S5.</b> High-resolution mass spectrum of CAFH•Br, m/z of [C <sub>8</sub> H <sub>11</sub> N <sub>4</sub> O <sub>2</sub> ] <sup>+</sup> : 195.08813. ....                                       | 7  |
| <b>Figure S6.</b> DFT-optimized molecular geometries of A. CAFH•Cl•ECH and B. CAFH•Cl•H <sub>2</sub> O and their relative stabilization energy. ....                                                    | 8  |
| <b>Figure S7.</b> <sup>1</sup> H NMR spectrum of ECH conversion in DMSO- <i>d</i> <sub>6</sub> , x: water, peaks at 3.17 and 7.87 ppm are corresponding to the catalyst (Table 1, Entry 1). ....        | 9  |
| <b>Figure S8.</b> <sup>1</sup> H NMR spectrum of ECH conversion in DMSO- <i>d</i> <sub>6</sub> , x: water, peaks at 3.17 and 7.92 ppm are corresponding to the catalyst (Table 1, Entry 2). ....        | 10 |
| <b>Figure S9.</b> <sup>1</sup> H NMR spectrum of ECH conversion in DMSO- <i>d</i> <sub>6</sub> , x: water, peak at 7.93 ppm is corresponding to the catalyst (Table 1, Entry 3). ....                   | 11 |
| <b>Figure S10.</b> <sup>1</sup> H NMR spectrum of ECH conversion in DMSO- <i>d</i> <sub>6</sub> , x: water, peak at 7.20 is corresponding to CAF (Table 1, Entry 4). ....                               | 12 |

|                                                                                                                                                                                                                                                                                                             |    |
|-------------------------------------------------------------------------------------------------------------------------------------------------------------------------------------------------------------------------------------------------------------------------------------------------------------|----|
| <b>Figure S11.</b> <sup>1</sup> H NMR spectrum of ECH conversion in DMSO- <i>d</i> <sub>6</sub> , the peak at 2.01 ppm ascribed to the methyl group in acetic acid. HBr acid promoted the ring opening step upon the formation of halo-alcoholic compounds. <sup>1,2</sup> ( <b>Table 1</b> , Entry 5)..... | 13 |
| <b>Figure S12.</b> <sup>1</sup> H NMR spectrum of ECH conversion in DMSO- <i>d</i> <sub>6</sub> , x: water. HI acid promoted the ring opening step upon the formation of halo-alcoholic compounds. <sup>1,2</sup> ( <b>Table 1</b> , Entry 6). .....                                                        | 14 |
| <b>Figure S13.</b> <sup>1</sup> H NMR spectrum of ECH conversion in DMSO- <i>d</i> <sub>6</sub> , x: water. HCl acid promoted the ring opening step upon the formation of halo-alcoholic compounds. <sup>1,2</sup> ( <b>Table 1</b> , Entry 7). .....                                                       | 15 |
| <b>Figure S14.</b> <sup>1</sup> H NMR spectrum of ECH conversion in DMSO- <i>d</i> <sub>6</sub> , s: solvent, x: water ( <b>Table 1</b> , Entry 8). .....                                                                                                                                                   | 16 |
| <b>Figure S15.</b> <sup>1</sup> H NMR spectrum of ECH conversion in DMSO- <i>d</i> <sub>6</sub> , s: solvent, x: water ( <b>Table 1</b> , Entry 9). .....                                                                                                                                                   | 17 |
| <b>Figure S16.</b> <sup>1</sup> H NMR spectrum of ECH conversion in DMSO- <i>d</i> <sub>6</sub> ( <b>Table 1</b> , Entry 10).....                                                                                                                                                                           | 18 |
| <b>Figure S17.</b> <sup>1</sup> H NMR spectrum of ECH conversion in DMSO- <i>d</i> <sub>6</sub> ( <b>Table 1</b> , Entry 11).....                                                                                                                                                                           | 19 |
| <b>Figure S18.</b> <sup>1</sup> H NMR spectrum of ECH conversion in DMSO- <i>d</i> <sub>6</sub> ( <b>Table 2</b> , Entry 1).....                                                                                                                                                                            | 20 |
| <b>Figure S19.</b> <sup>1</sup> H NMR spectrum of ECH conversion in DMSO- <i>d</i> <sub>6</sub> in CAFH•Br/KI (1:1, <b>Table 2</b> , Entry 2). .....                                                                                                                                                        | 21 |
| <b>Figure S20.</b> <sup>1</sup> H NMR spectrum of ECH conversion in DMSO- <i>d</i> <sub>6</sub> in CAFH•Br/KI (1:2, <b>Table 2</b> , Entry 2). .....                                                                                                                                                        | 22 |
| <b>Figure S21.</b> <sup>1</sup> H NMR spectrum of ECH conversion in DMSO- <i>d</i> <sub>6</sub> in CAFH•Br/KBr (1:1, <b>Table 2</b> , Entry 3). .....                                                                                                                                                       | 23 |
| <b>Figure S22.</b> <sup>1</sup> H NMR spectrum of ECH conversion in DMSO- <i>d</i> <sub>6</sub> in CAFH•Br/KBr (1:2, <b>Table 2</b> , Entry 3). .....                                                                                                                                                       | 24 |
| <b>Figure S23.</b> <sup>1</sup> H NMR spectrum of ECH conversion in DMSO- <i>d</i> <sub>6</sub> in CAFH•Br/KCl (1:1, <b>Table 2</b> , Entry 4). .....                                                                                                                                                       | 25 |
| <b>Figure S24.</b> <sup>1</sup> H NMR spectrum of ECH conversion in DMSO- <i>d</i> <sub>6</sub> , x: water, in CAFH•Br/KCl (1:2, <b>Table 2</b> , Entry 4). .....                                                                                                                                           | 26 |

|                                                                                                                                                                                                                                                                           |    |
|---------------------------------------------------------------------------------------------------------------------------------------------------------------------------------------------------------------------------------------------------------------------------|----|
| <b>Figure S25.</b> <sup>1</sup> H NMR spectrum of ECH conversion in DMSO- <i>d</i> <sub>6</sub> , x: water, in CAFH•Br/KF (1:1, Table 2, Entry 5). .....                                                                                                                  | 27 |
| <b>Figure S26.</b> <sup>1</sup> H NMR spectrum of ECH conversion in DMSO- <i>d</i> <sub>6</sub> , x: water in CAFH•Br/KF (1:2, Table 2, Entry 5). .....                                                                                                                   | 28 |
| <b>Figure S27.</b> <sup>1</sup> H NMR spectrum of ECH conversion in DMSO- <i>d</i> <sub>6</sub> catalyzed by CAFH•Br, x: water, the peaks at 7.87 ppm corresponding to the catalyst (Table 3, Entry 1). .....                                                             | 29 |
| <b>Figure S28.</b> <sup>1</sup> H NMR spectrum of ECH conversion in DMSO- <i>d</i> <sub>6</sub> catalyzed by CAFH•Br/KI, x: water, the peaks at 7.87 ppm corresponding to the catalyst (Table 3, Entry 1). .....                                                          | 30 |
| <b>Figure S29.</b> <sup>1</sup> H NMR spectrum of EBH conversion in DMSO- <i>d</i> <sub>6</sub> catalyzed by CAFH•Br, x: water, peaks at 3.17 and 7.91 ppm are corresponding to the catalyst (Table 3, Entry 2). .....                                                    | 31 |
| <b>Figure S30.</b> <sup>1</sup> H NMR spectrum of EBH conversion in DMSO- <i>d</i> <sub>6</sub> catalyzed by CAFH•Br/KI, x: water, peaks at 3.17 and 7.93 ppm are corresponding to the catalyst (Table 3, Entry 2). .....                                                 | 32 |
| <b>Figure S31.</b> <sup>1</sup> H NMR spectrum of PO conversion in DMSO- <i>d</i> <sub>6</sub> catalyzed by CAFH•Br, s: solvent, x: water, peaks at 3.16 and 7.89 ppm are corresponding to the catalyst (Table 3, Entry 3). .....                                         | 33 |
| <b>Figure S32.</b> <sup>1</sup> H NMR spectrum of PO conversion in DMSO- <i>d</i> <sub>6</sub> catalyzed by CAFH•Br/KI, s: solvent, x: water, peaks at 3.16, 3.82 and 7.89 ppm are corresponding to the catalyst (Table 3, Entry 3). .....                                | 34 |
| <b>Figure S33.</b> <sup>1</sup> H NMR spectra of SO conversion in DMSO- <i>d</i> <sub>6</sub> catalyzed by CAFH•Br, x: water, peaks at 3.18 and 7.91 ppm are corresponding to the catalyst (Table 3, Entry 4). .....                                                      | 35 |
| <b>Figure S34.</b> <sup>1</sup> H NMR spectrum of SO conversion in DMSO- <i>d</i> <sub>6</sub> catalyzed by CAFH•Br/KI, x: water, peaks at 3.17 and 7.93 ppm are corresponding to the catalyst (Table 3, Entry 4). .....                                                  | 36 |
| <b>Figure S35.</b> <sup>1</sup> H NMR spectra in DMSO- <i>d</i> <sub>6</sub> of: <b>A.</b> LO (maroon trace); <b>B.</b> LO coupled with CO <sub>2</sub> (blue trace) in the presence of CAFH•Br/KI. The cyclic carbonate peaks are not observed (Table 3, Entry 5). ..... | 37 |
| <b>Figure S36.</b> Reusability of CAFH•Br over five catalytic cycles. The linear decrease in catalytic activity was anticipated to losses during catalyst separation and filtration. ....                                                                                 | 38 |
| <b>Figure S37.</b> <sup>13</sup> C NMR spectra of CAFH•Br (blue trace), unreacted ECH (red traces), and CAFH•Br/ring opened ECH under N <sub>2</sub> atmosphere (green trace) in DMSO- <i>d</i> <sub>6</sub> . .....                                                      | 38 |

**Figure S38.** ATR-FTIR of the original mixture (blue traces), spectrum showed C-Br bond upon the alkoxide formation (red traces), spectrum showed C-Br bond disappearing upon bubbling with CO<sub>2</sub> (green traces).....39

**Table S1.** Elemental analysis for each caffeine adduct.

|   | CAFH•Br   |        | CAFH•I•H <sub>2</sub> O |        | CAFH•Cl•2H <sub>2</sub> O |        |
|---|-----------|--------|-------------------------|--------|---------------------------|--------|
|   | Expected% | Found% | Expected%               | Found% | Expected%                 | Found% |
| C | 34.93     | 34.82  | 28.25                   | 28.44  | 36.03                     | 36.02  |
| H | 4.03      | 3.92   | 3.85                    | 4.10   | 5.67                      | 4.63   |
| N | 20.37     | 20.21  | 16.47                   | 16.48  | 21.01                     | 20.85  |

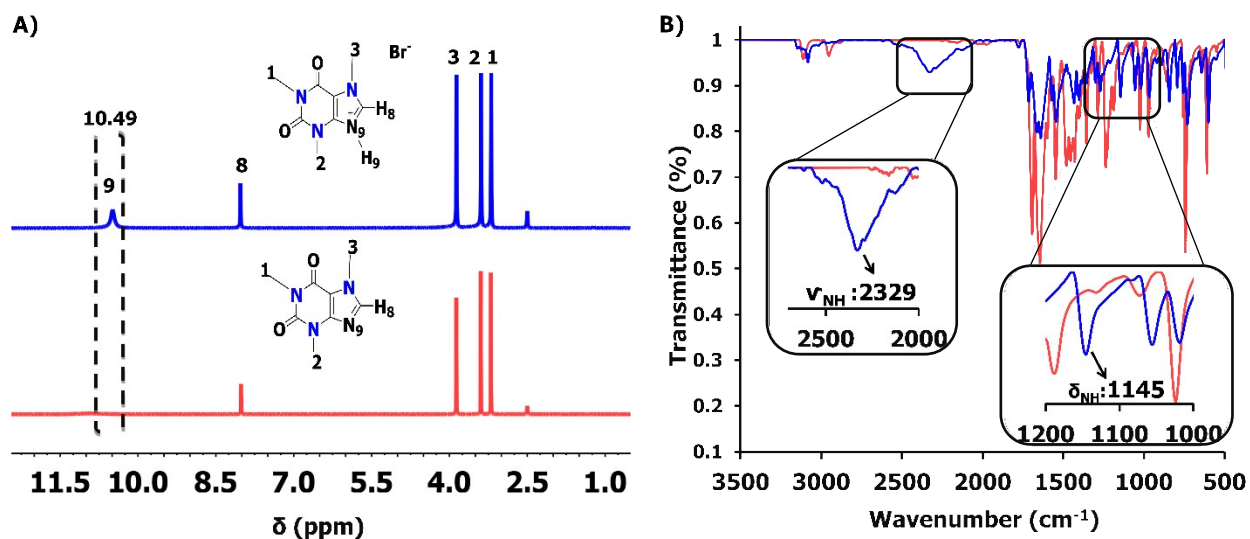

**Figure S1.** A. <sup>1</sup>H NMR spectra of the parent CAF molecule and its bromide adduct in DMSO-*d*<sub>6</sub>, B. ATR-FTIR spectra of CAF (red trace) and CAFH•Br (blue trace).

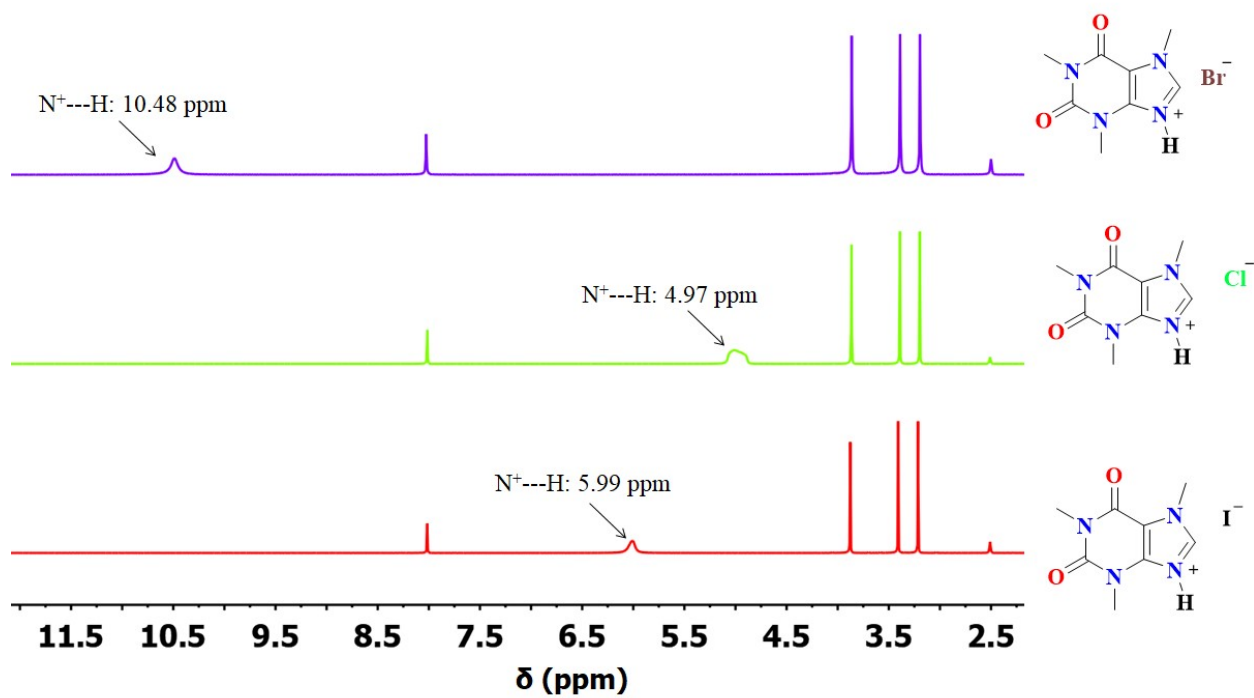

Figure S2.  $^1\text{H}$  NMR spectra of caffeineium salts dissolved in  $\text{DMSO-}d_6$ .

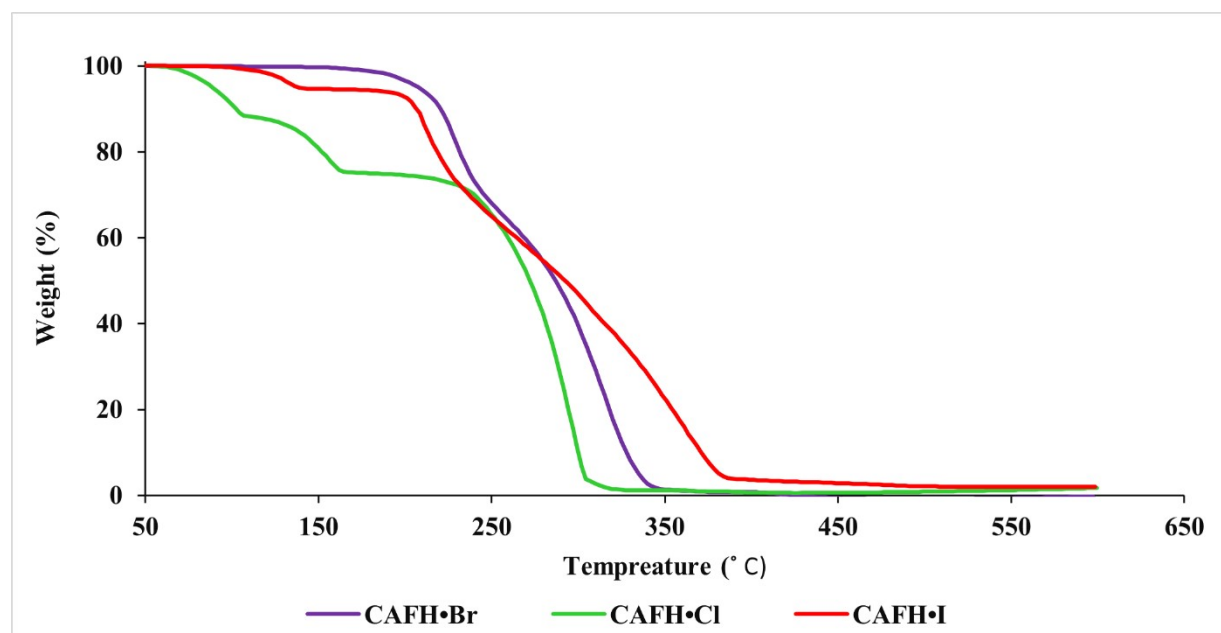

Figure S3. The TGA traces of the caffeineium adducts.

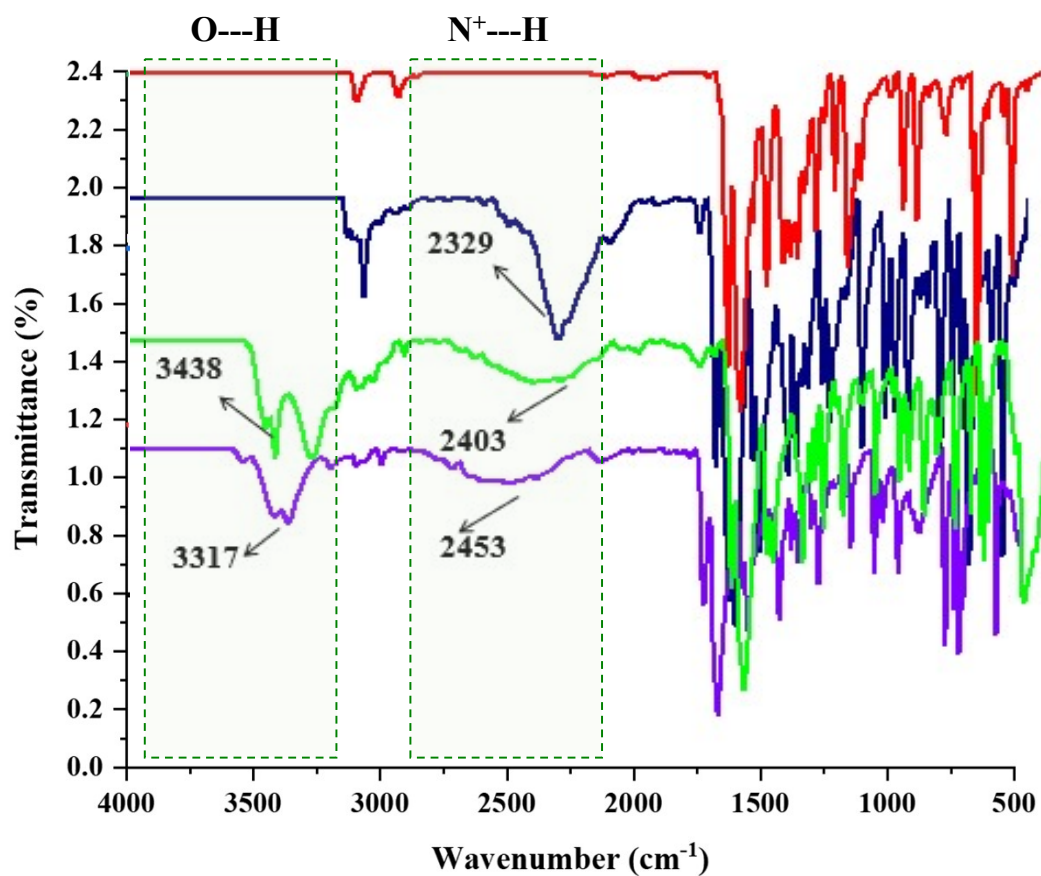

Figure S4. ATR-FTIR spectra of CAF (red trace), CAFH•Br (dark blue trace), CAFH•Cl (green trace), and CAFH•I (violet trace).

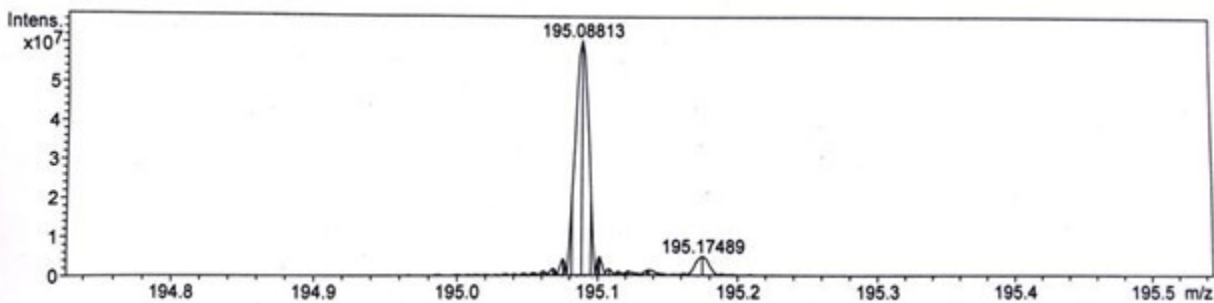

Figure S5. High-resolution mass spectrum of CAFH•Br,  $m/z$  of  $[C_8H_{11}N_4O_2]^+$ : 195.08813.

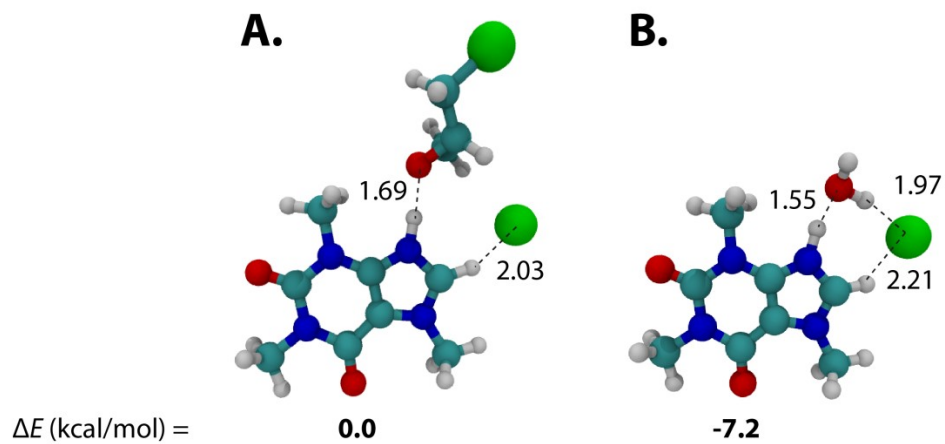

**Figure S6.** DFT-optimized molecular geometries of **A.** CAFH•Cl•ECH and **B.** CAFH•Cl•H<sub>2</sub>O and their relative stabilization energy.



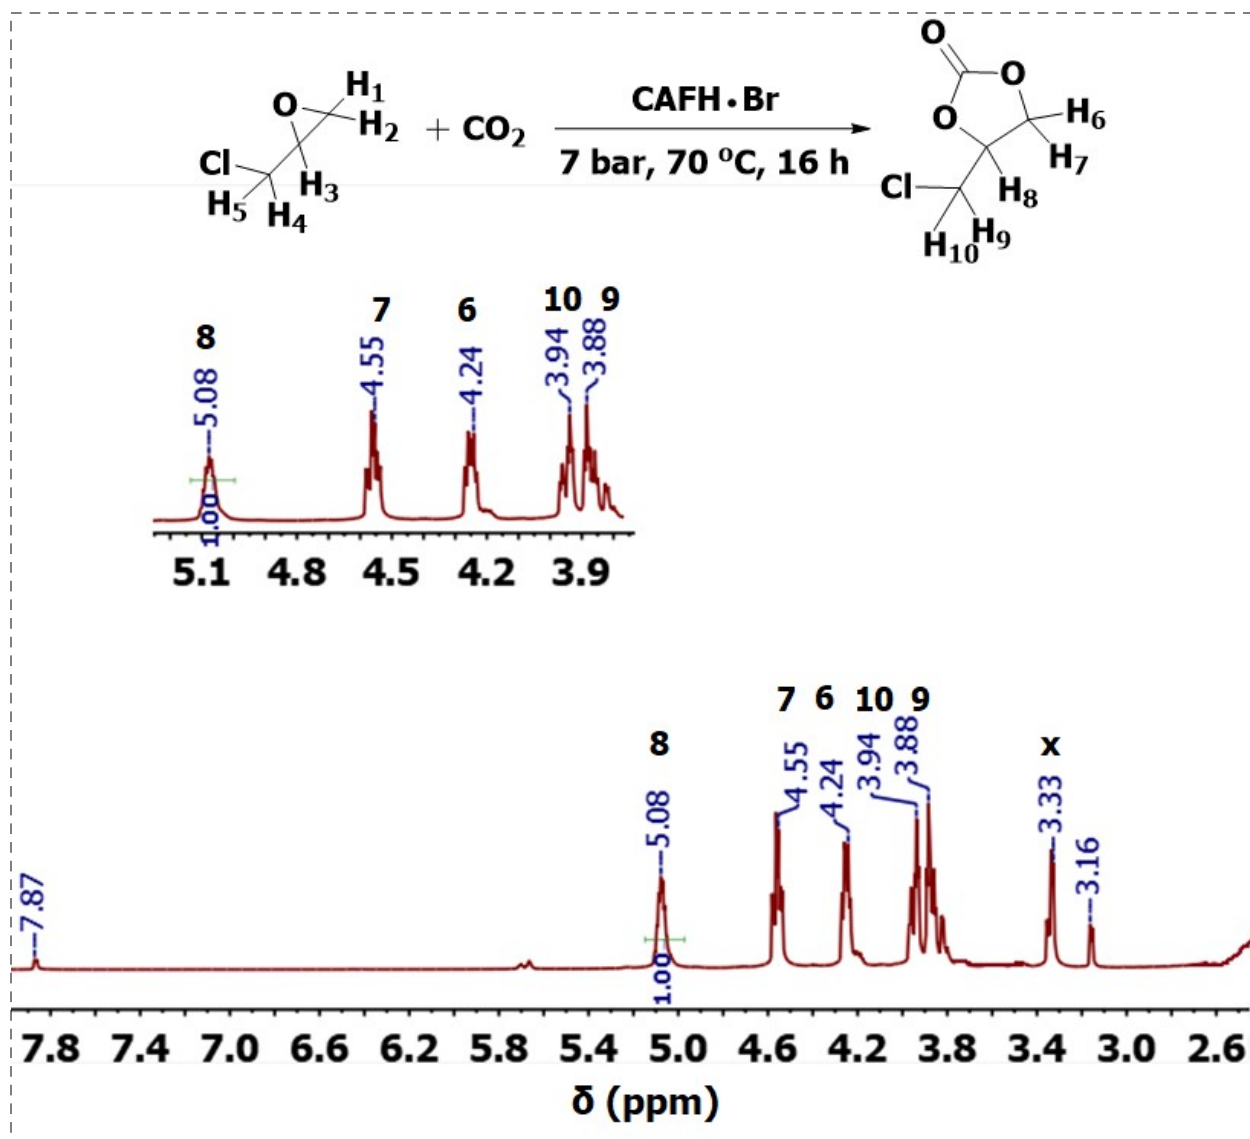

**Figure S7.**  $^1\text{H}$  NMR spectrum of ECH conversion in  $\text{DMSO}-d_6$ , x: water, peaks at 3.17 and 7.87 ppm are corresponding to the catalyst (Table 1, Entry 1).

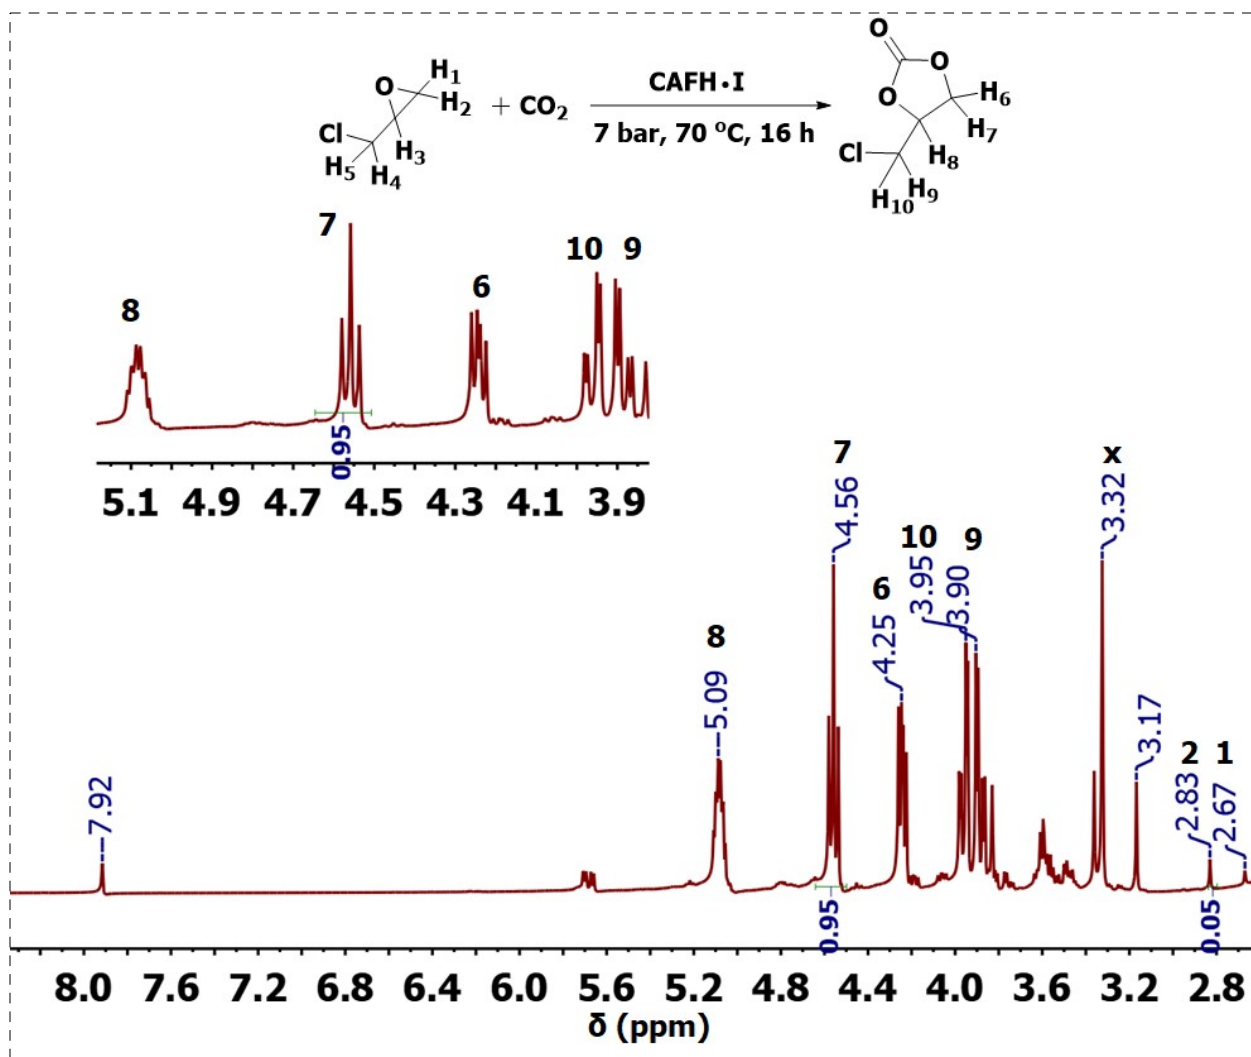

**Figure S8.**  $^1\text{H}$  NMR spectrum of ECH conversion in  $\text{DMSO}-d_6$ , x: water, peaks at 3.17 and 7.92 ppm are corresponding to the catalyst (Table 1, Entry 2).

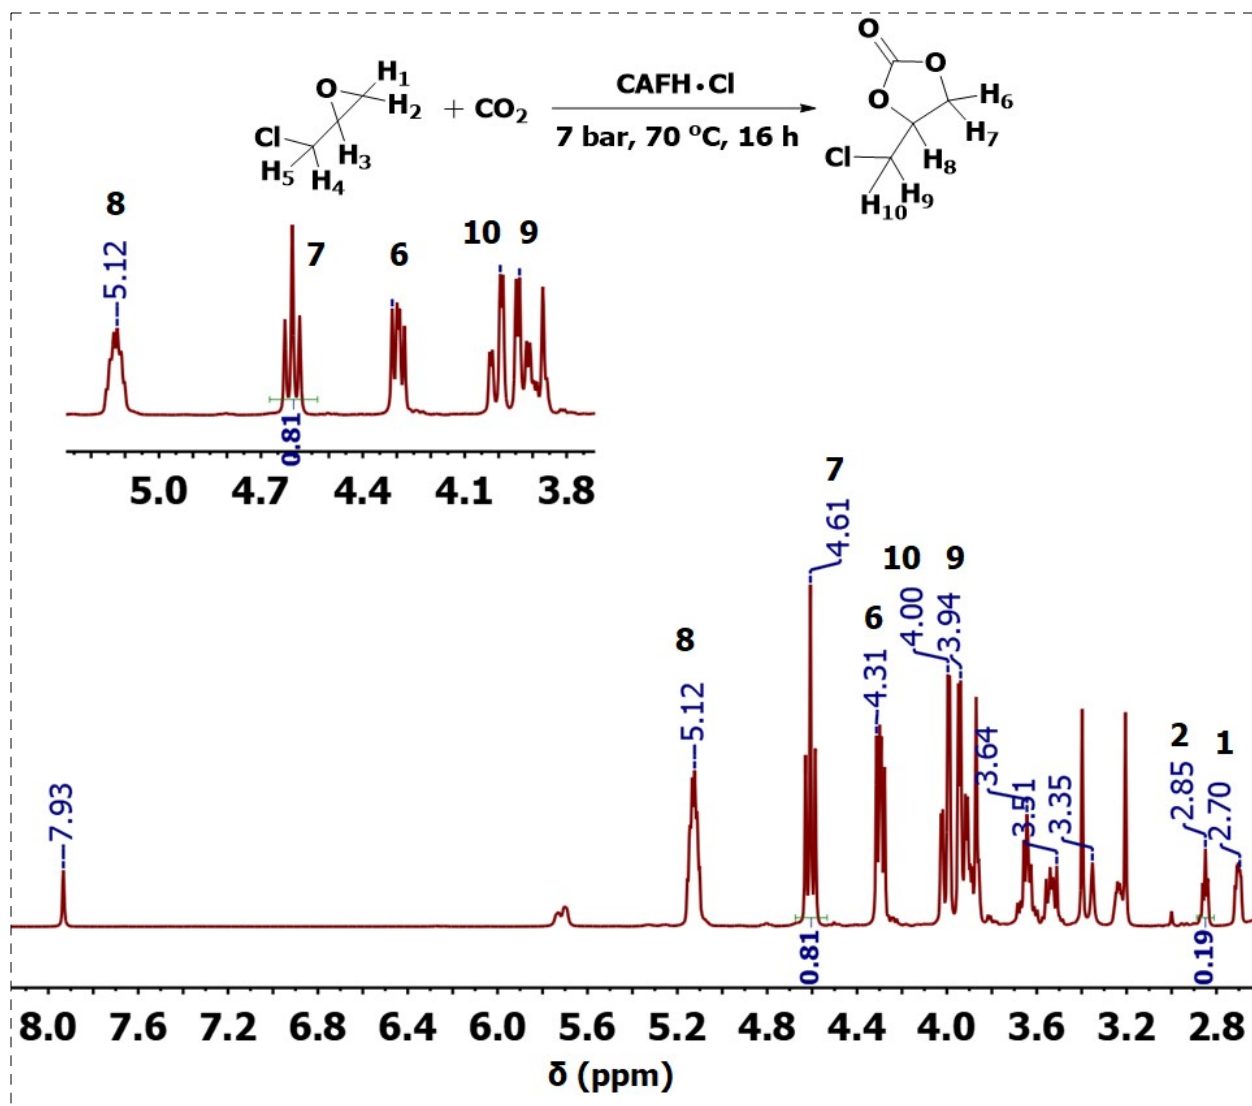

**Figure S9.**  $^1\text{H}$  NMR spectrum of ECH conversion in  $\text{DMSO}-d_6$ , x: water, peak at 7.93 ppm is corresponding to the catalyst (Table 1, Entry 3).

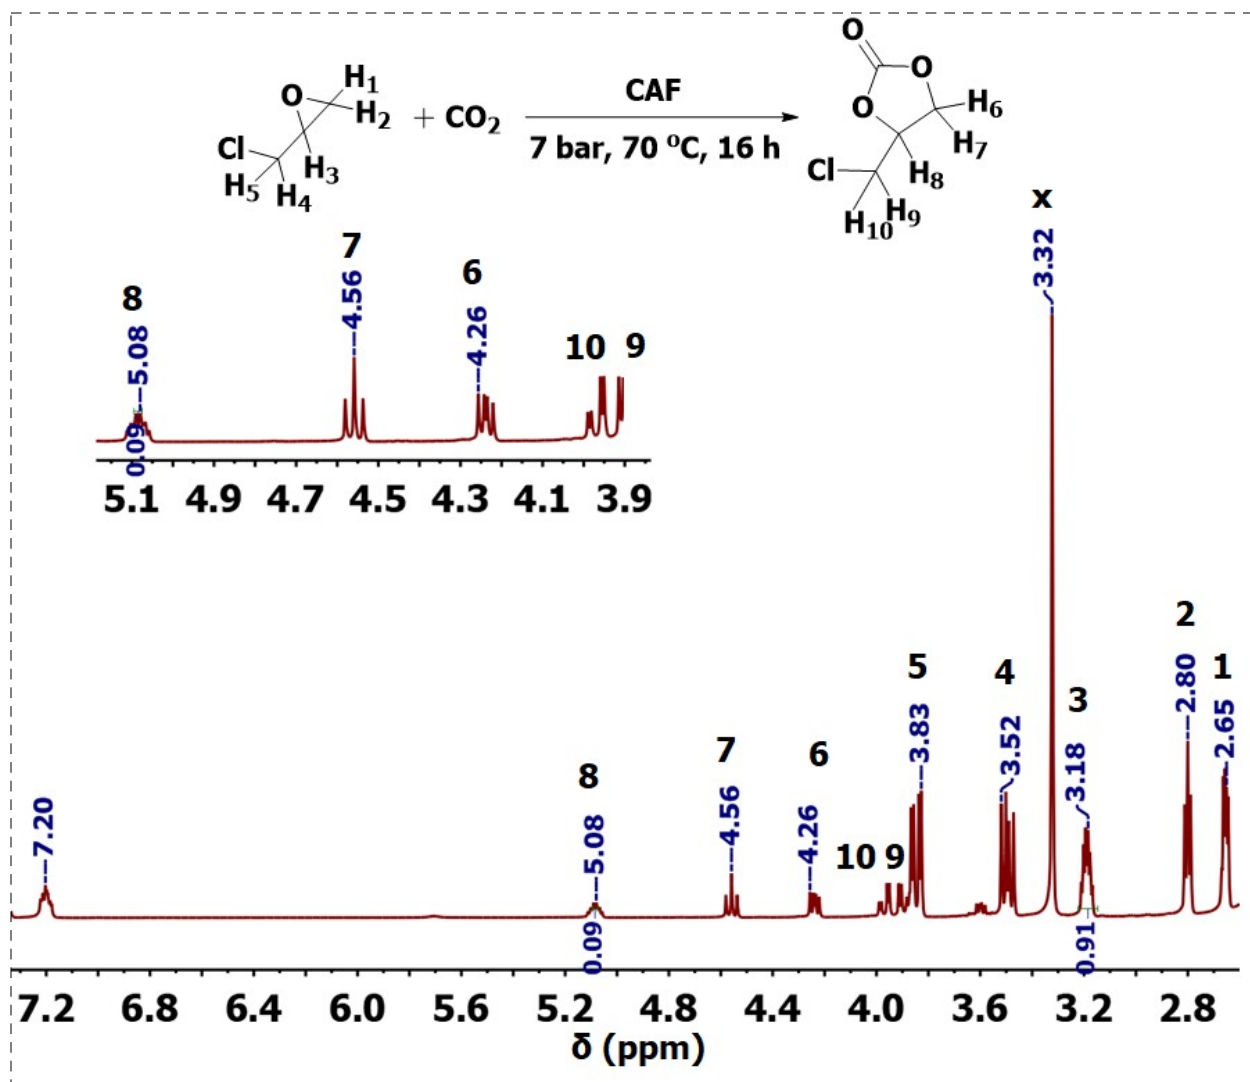

**Figure S10.** <sup>1</sup>H NMR spectrum of ECH conversion in DMSO-*d*<sub>6</sub>, x: water, peak at 7.20 is corresponding to CAF (Table 1, Entry 4).

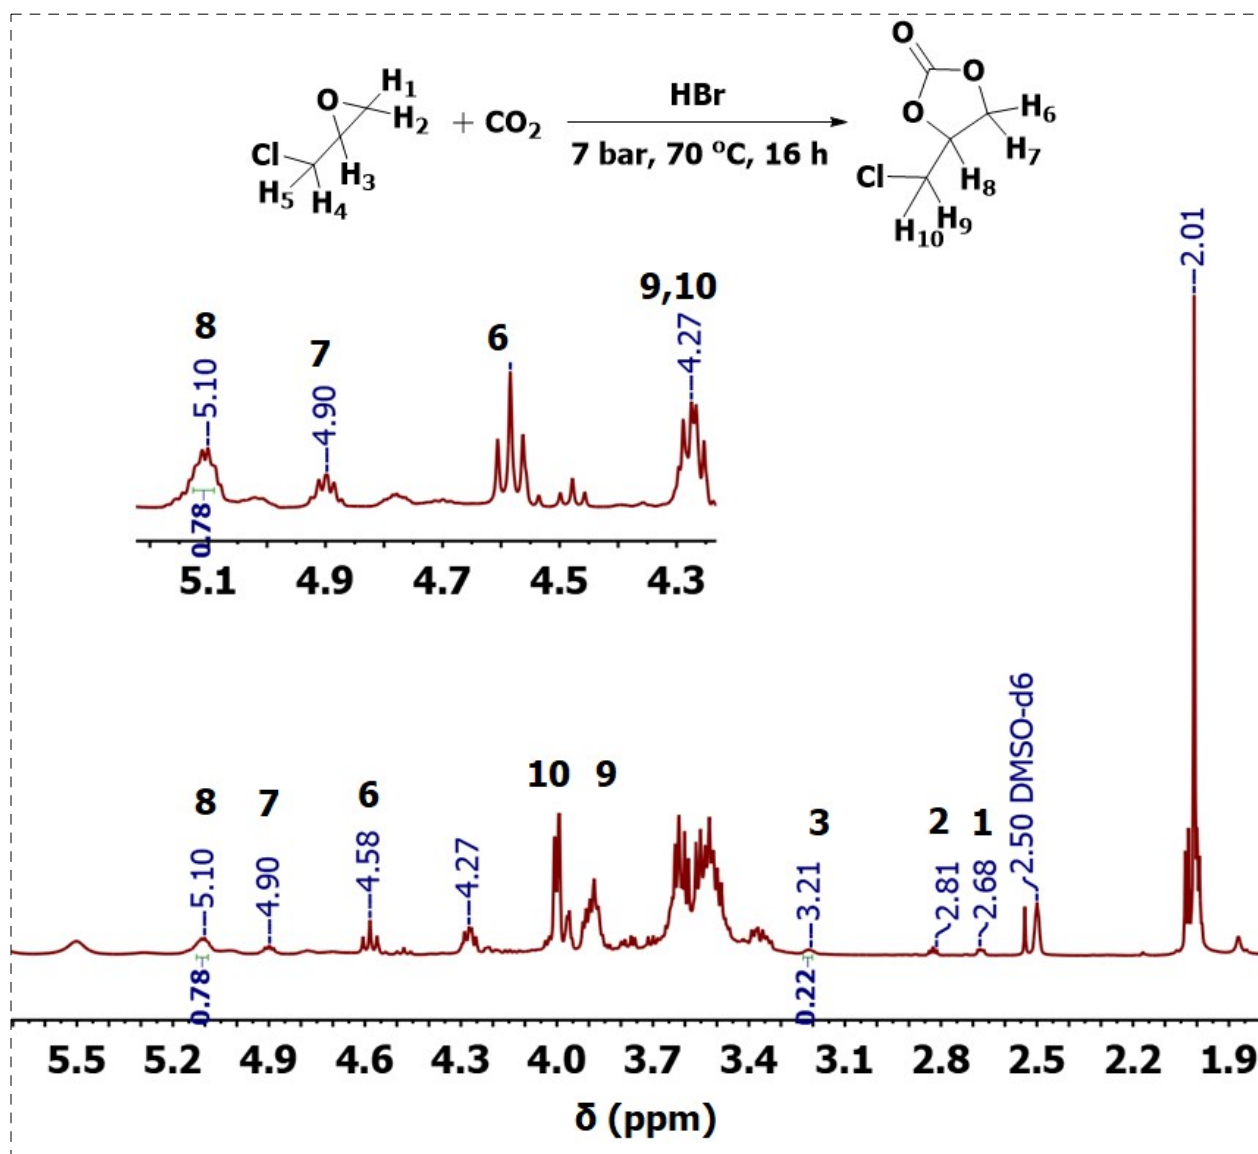

**Figure S11.**  $^1\text{H}$  NMR spectrum of ECH conversion in  $\text{DMSO-}d_6$ , the peak at 2.01 ppm ascribed to the methyl group in acetic acid.  $\text{HBr}$  acid promoted the ring opening step upon the formation of haloalcoholic compounds.<sup>1,2</sup> (Table 1, Entry 5).

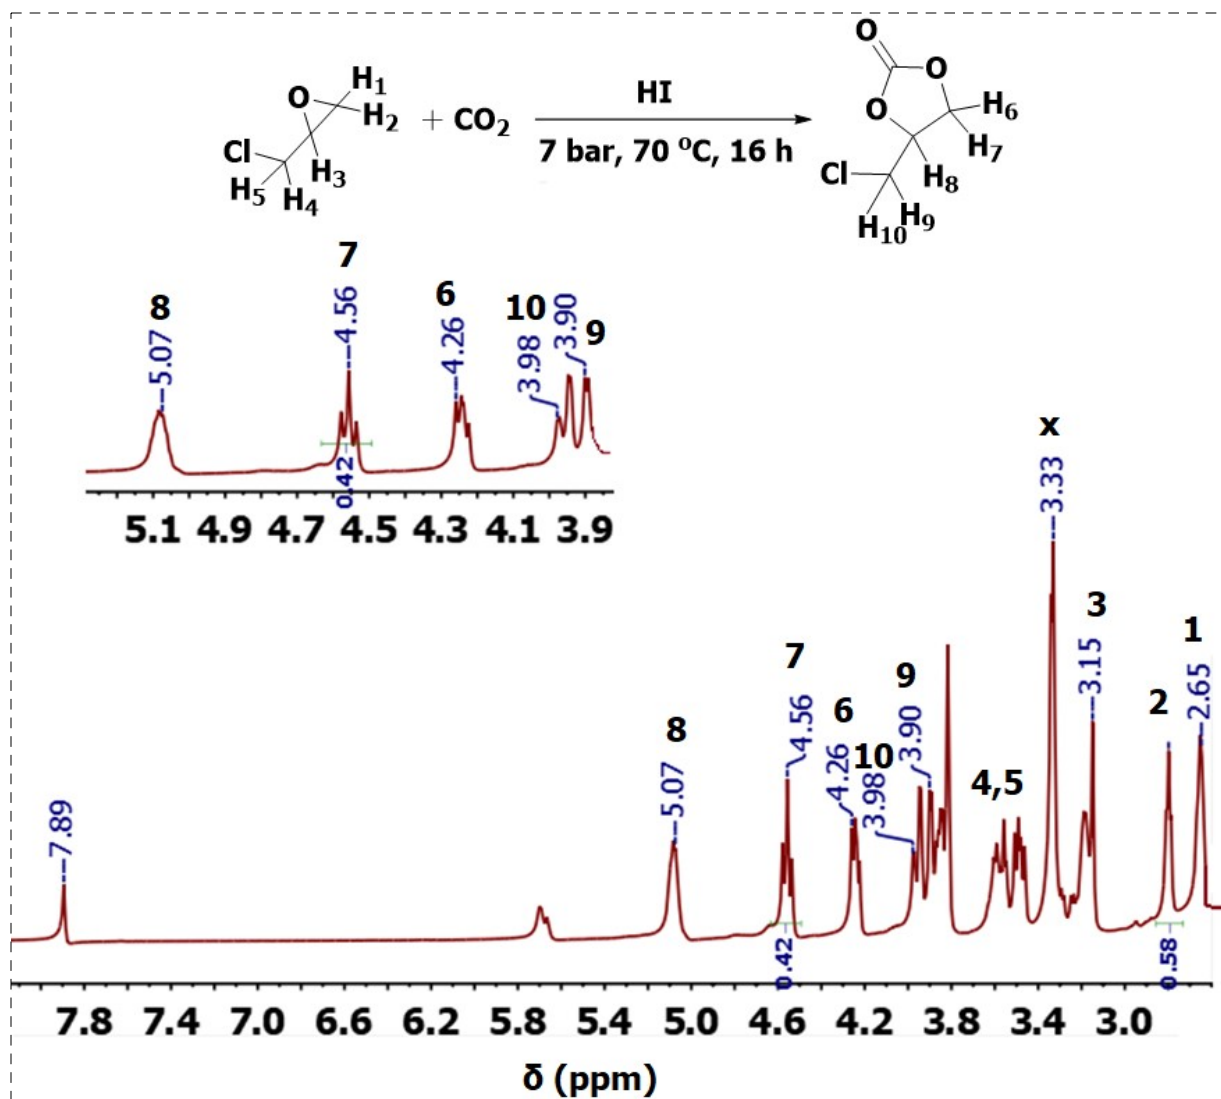

**Figure S12.**  $^1\text{H}$  NMR spectrum of ECH conversion in  $\text{DMSO-}d_6$ , x: water. HI acid promoted the ring opening step upon the formation of halo-alcoholic compounds.<sup>1,2</sup> (Table 1, Entry 6).

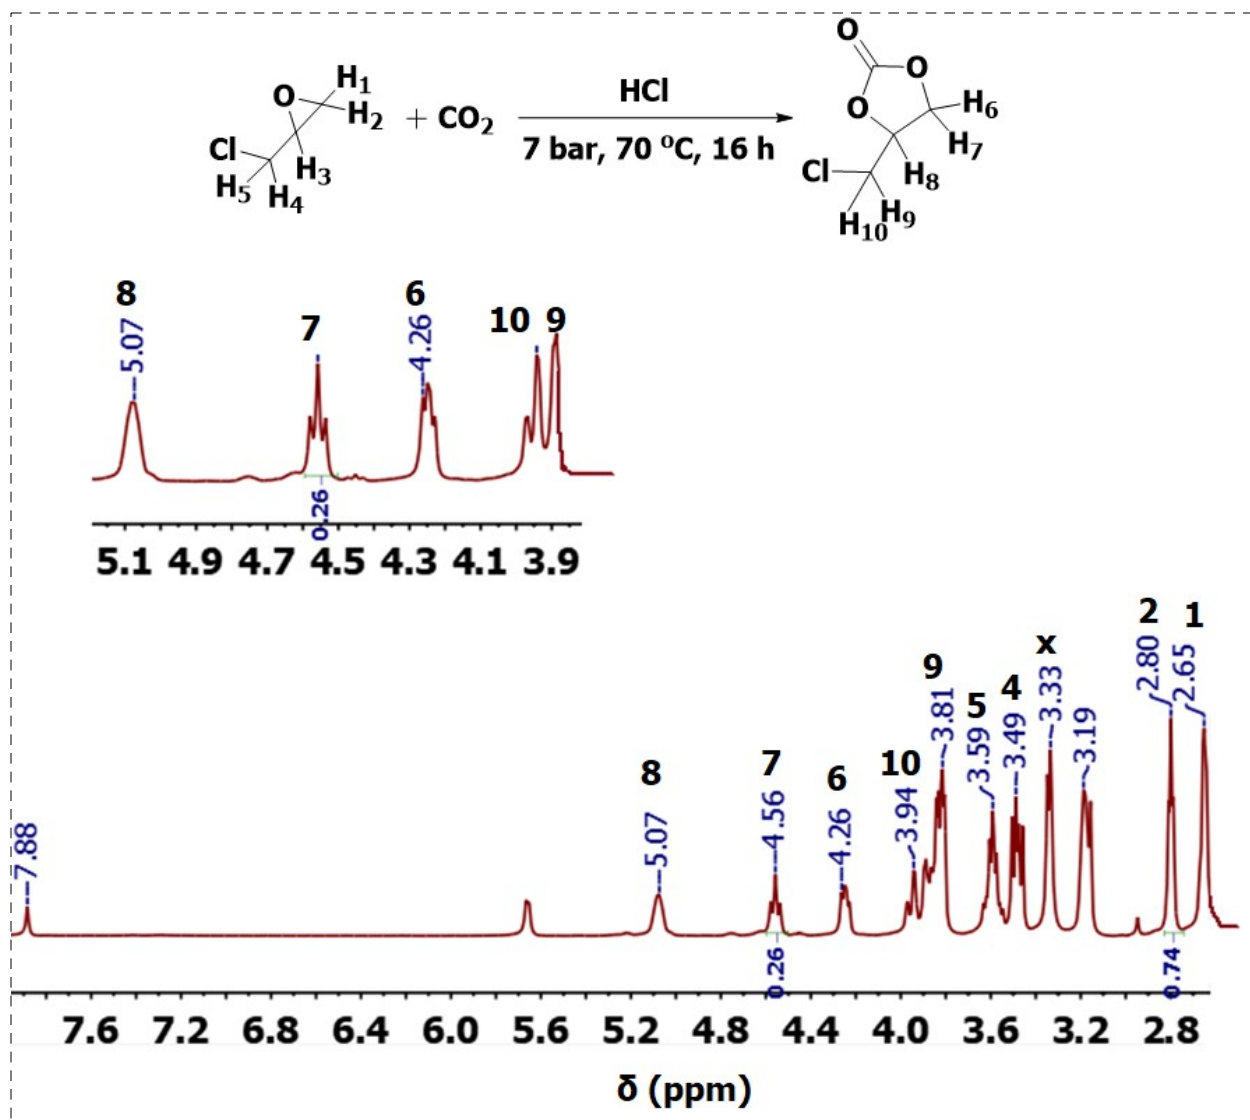

**Figure S13.** <sup>1</sup>H NMR spectrum of ECH conversion in DMSO-*d*<sub>6</sub>, x: water. HCl acid promoted the ring opening step upon the formation of halo-alcoholic compounds.<sup>1,2</sup> (Table 1, Entry 7).

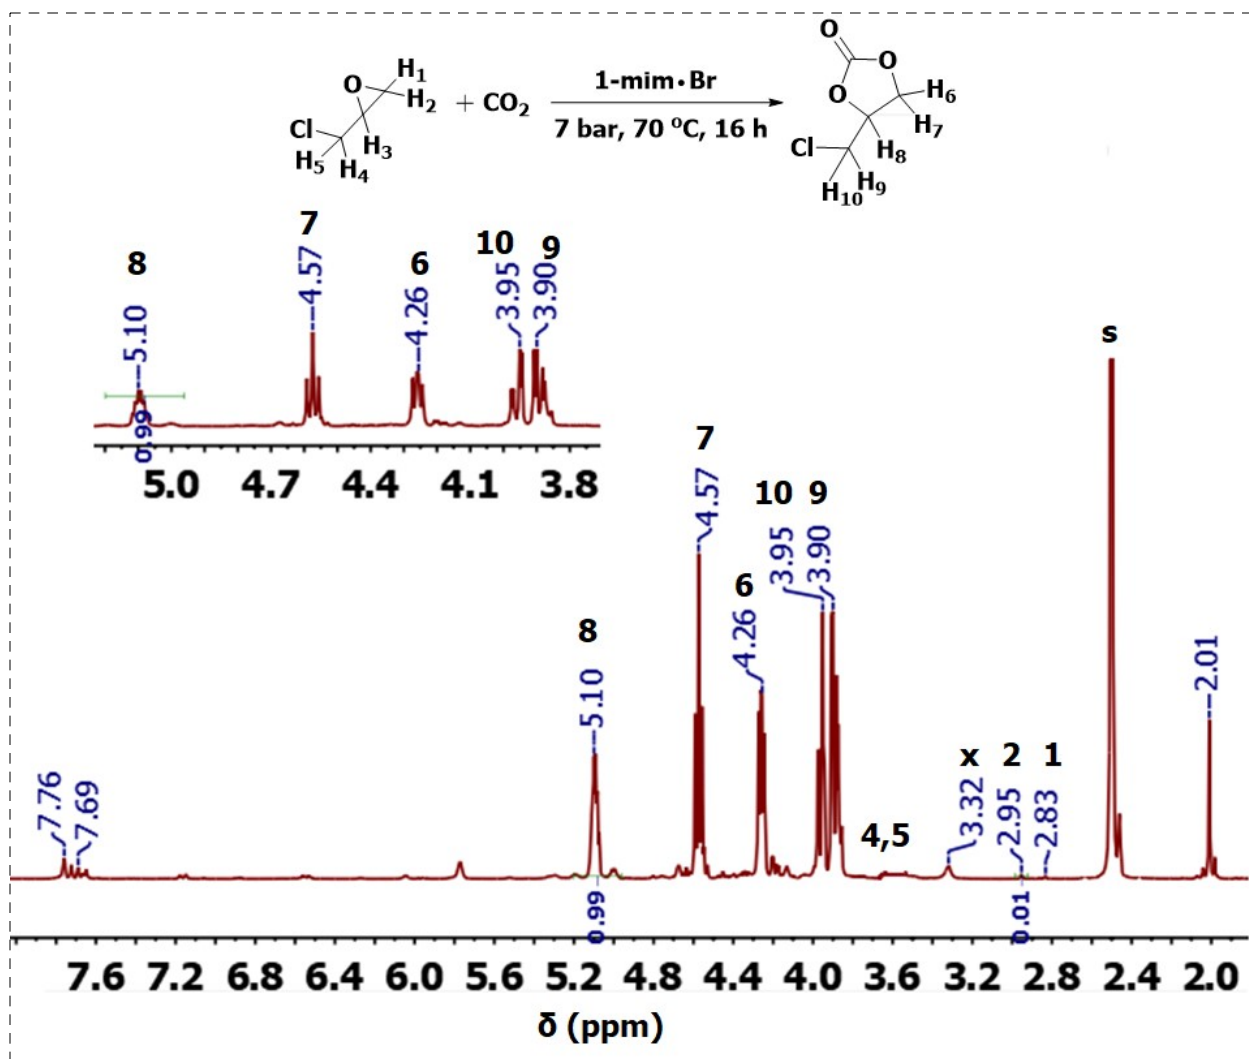

Figure S14. <sup>1</sup>H NMR spectrum of ECH conversion in DMSO-*d*<sub>6</sub>, s: solvent, x: water (Table 1, Entry 8).



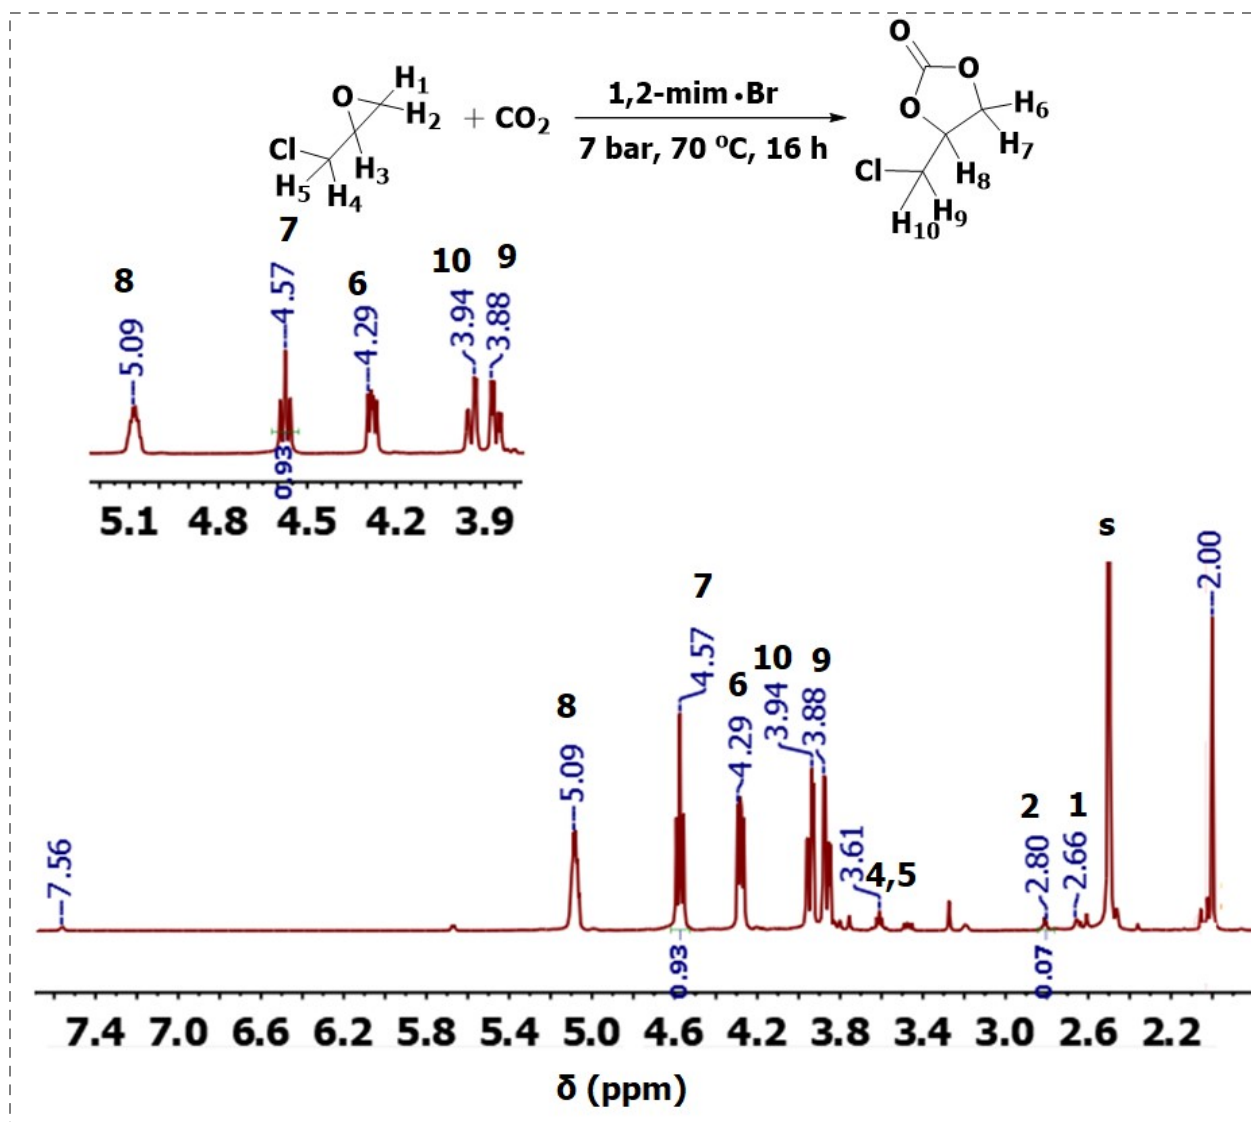

Figure S15. <sup>1</sup>H NMR spectrum of ECH conversion in DMSO-*d*<sub>6</sub>, s: solvent, x: water (Table 1, Entry 9).

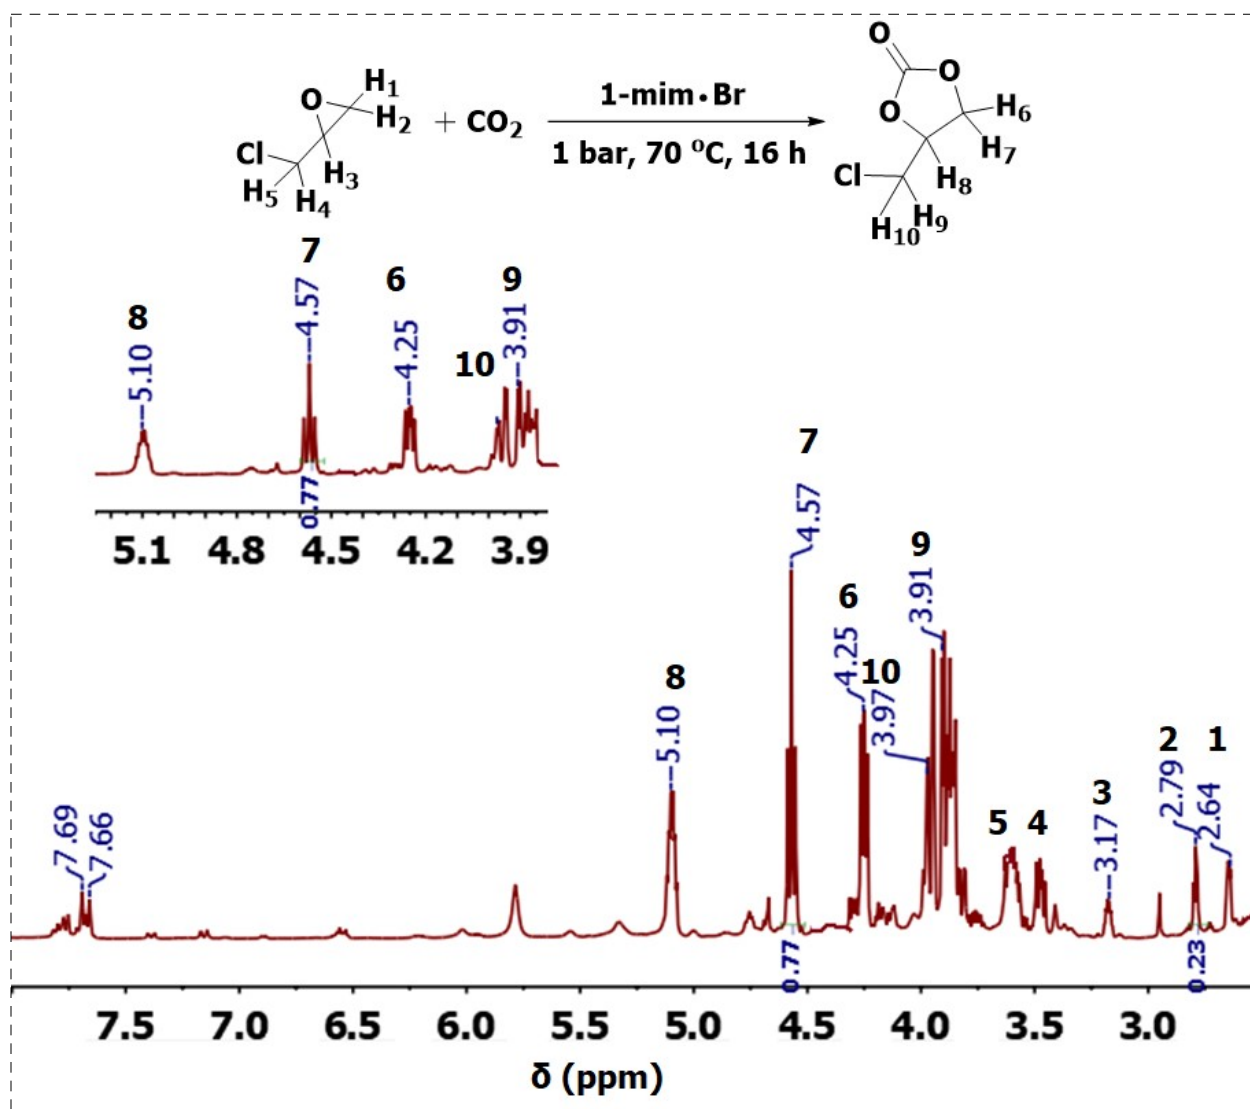

Figure S16. <sup>1</sup>H NMR spectrum of ECH conversion in DMSO-*d*<sub>6</sub> (Table 1, Entry 10).

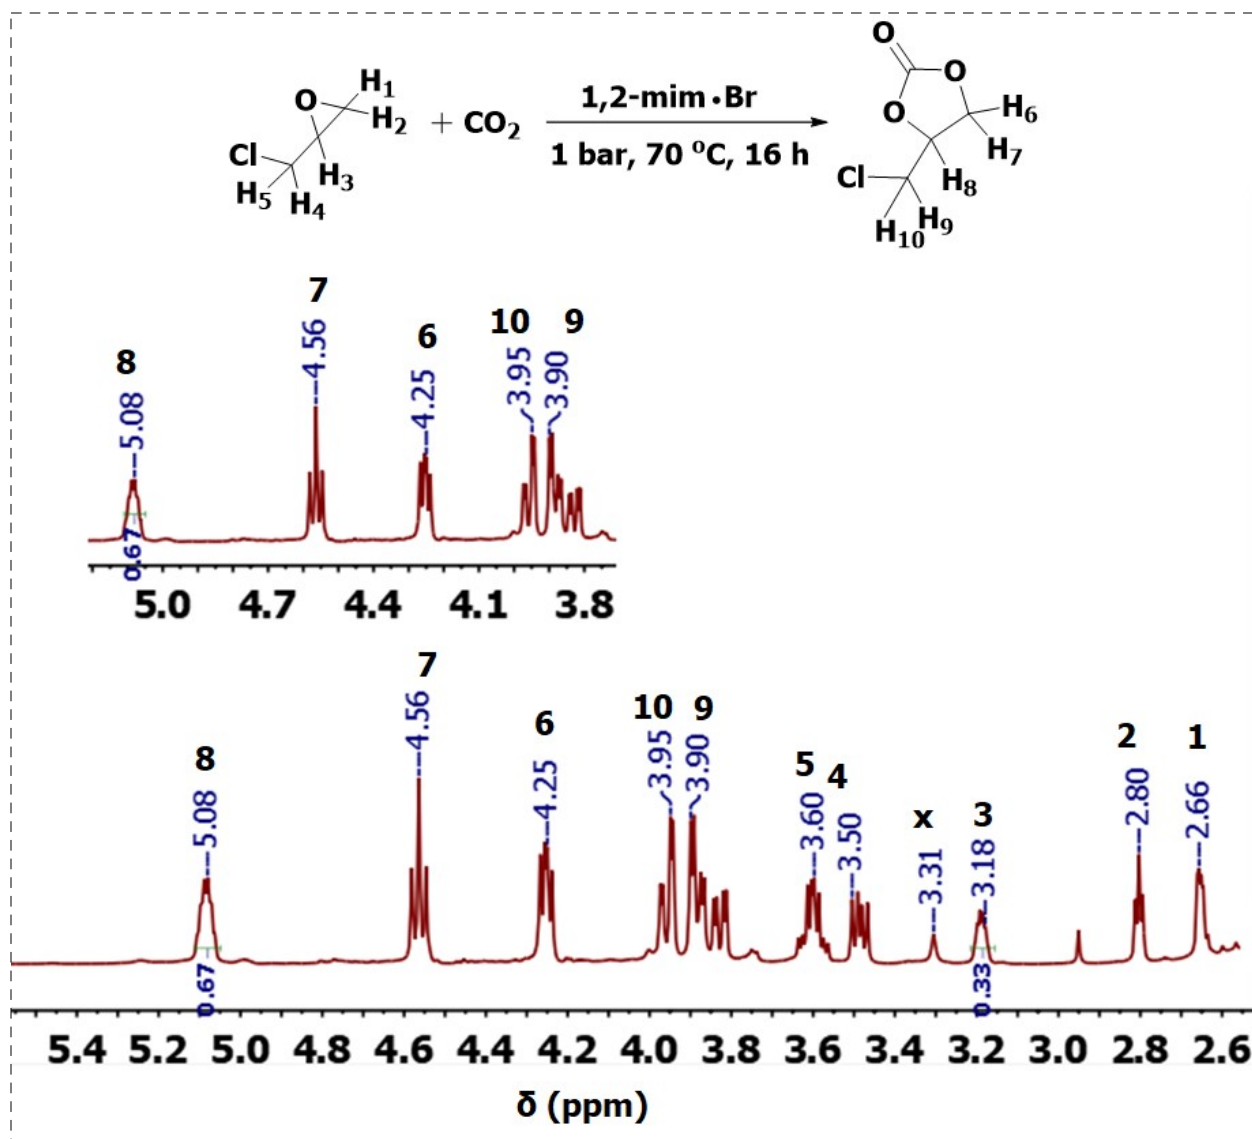

Figure S17. <sup>1</sup>H NMR spectrum of ECH conversion in DMSO-*d*<sub>6</sub> (Table 1, Entry 11).

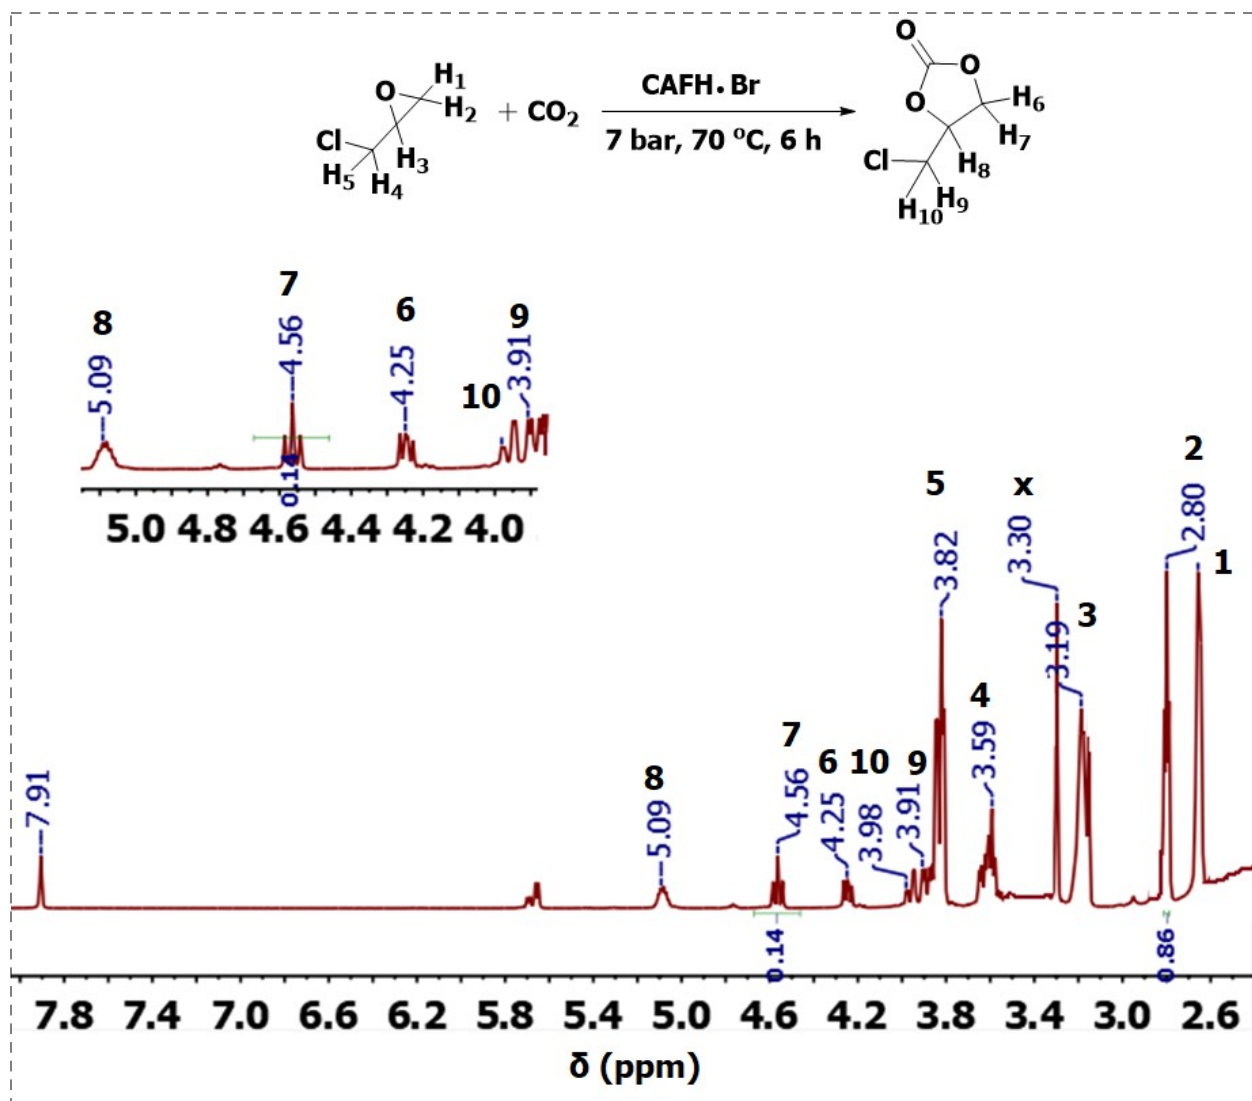

Figure S18. <sup>1</sup>H NMR spectrum of ECH conversion in DMSO-*d*<sub>6</sub> (Table 2, Entry 1).

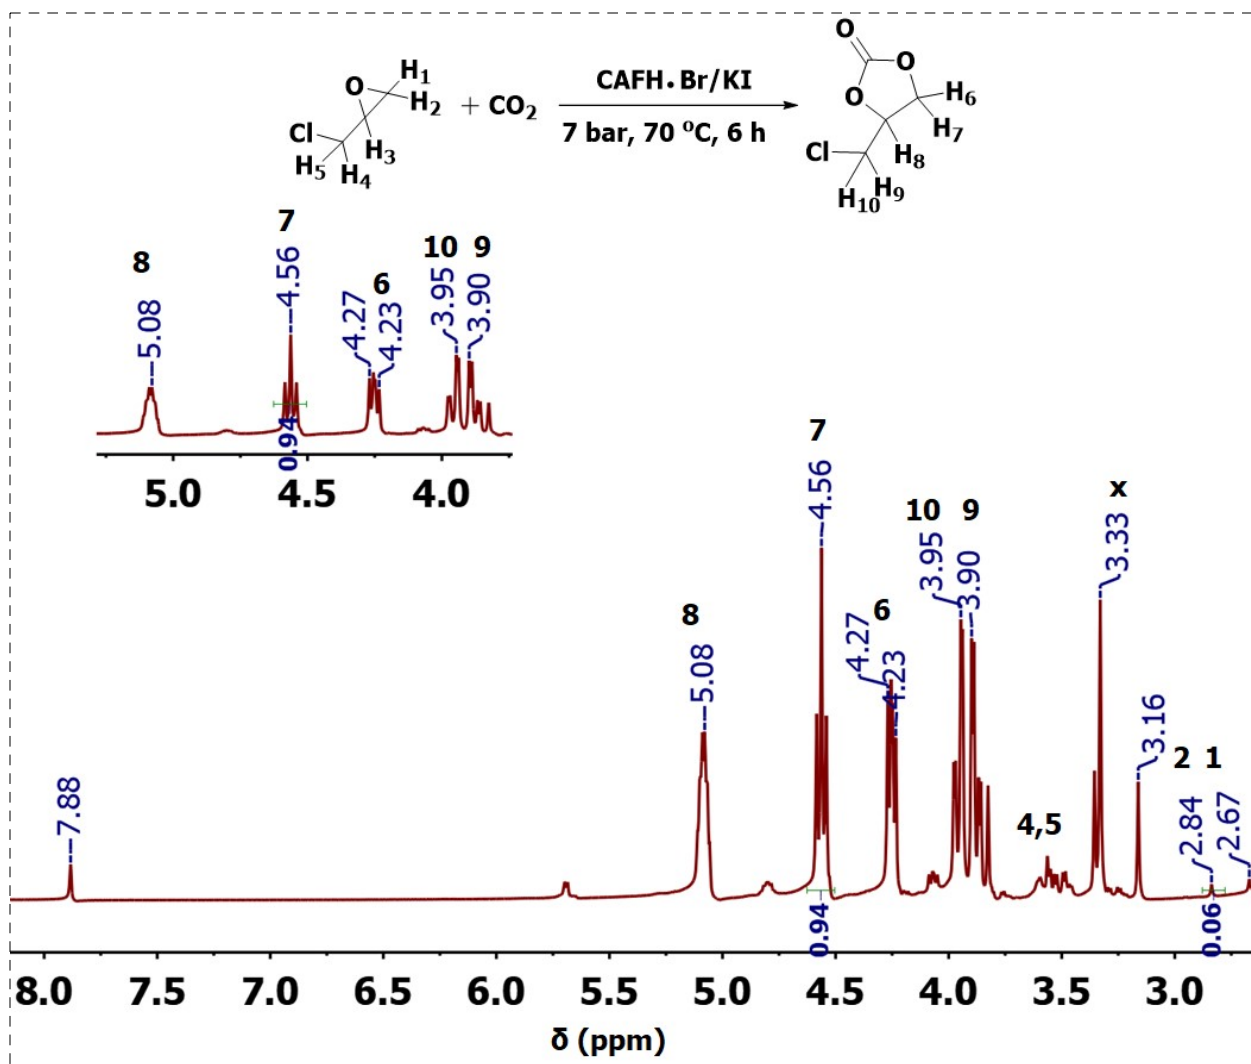

Figure S19. <sup>1</sup>H NMR spectrum of ECH conversion in DMSO-*d*<sub>6</sub> in CAFH·Br/KI (1:1, Table 2, Entry 2).

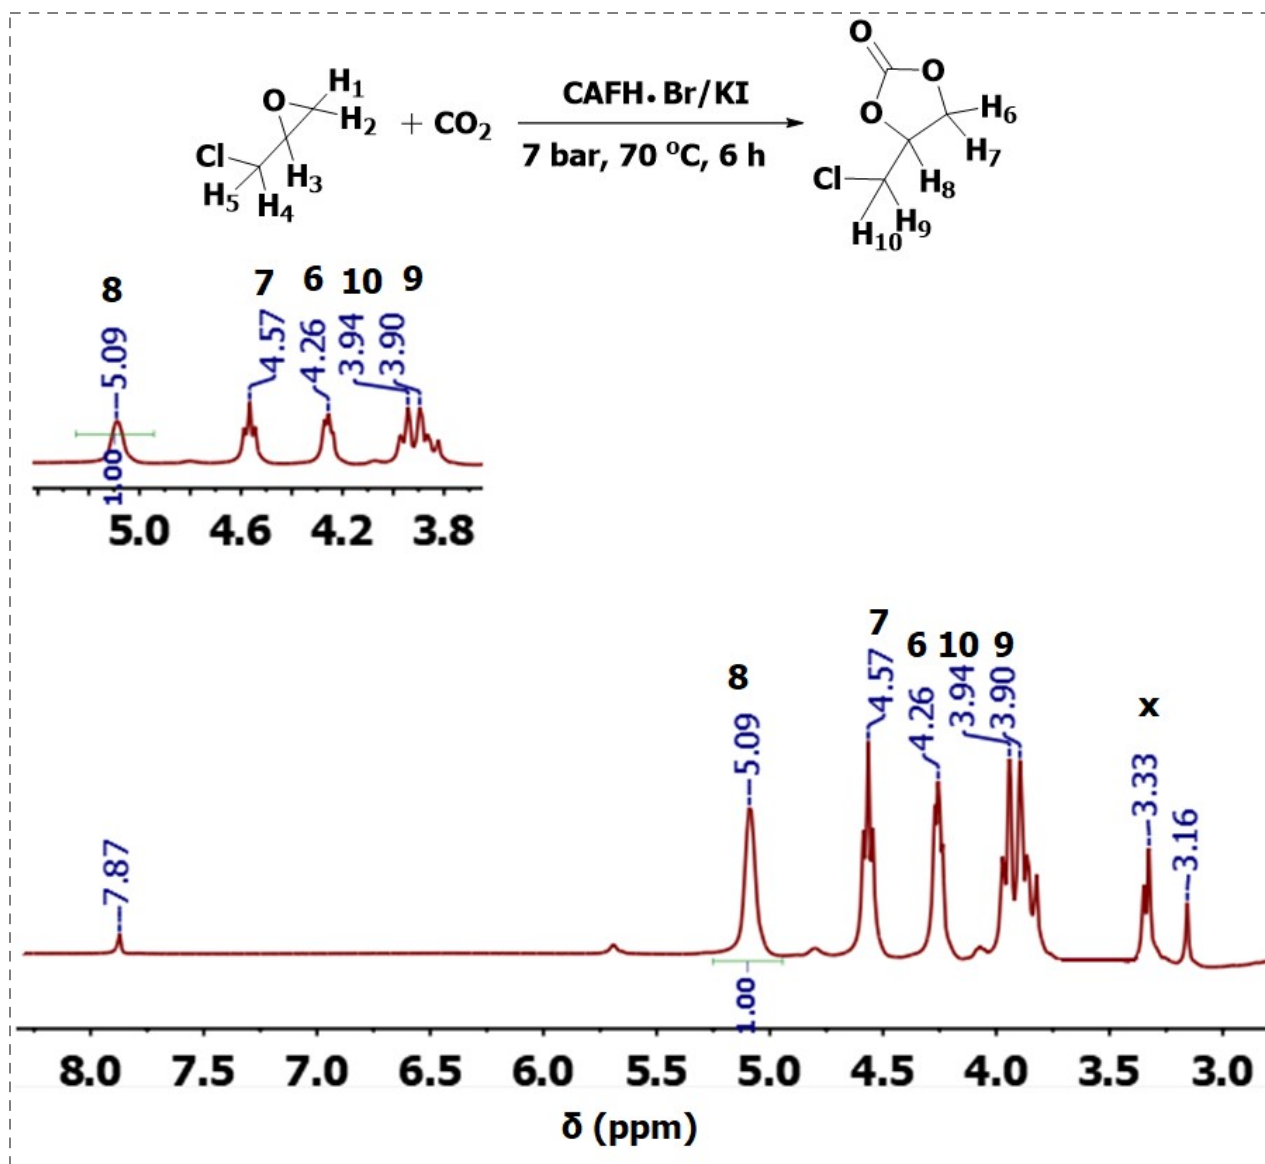

Figure S20.  $^1\text{H}$  NMR spectrum of ECH conversion in  $\text{DMSO}-d_6$  in  $\text{CAFH}\cdot\text{Br/KI}$  (1:2, Table 2, Entry 2).

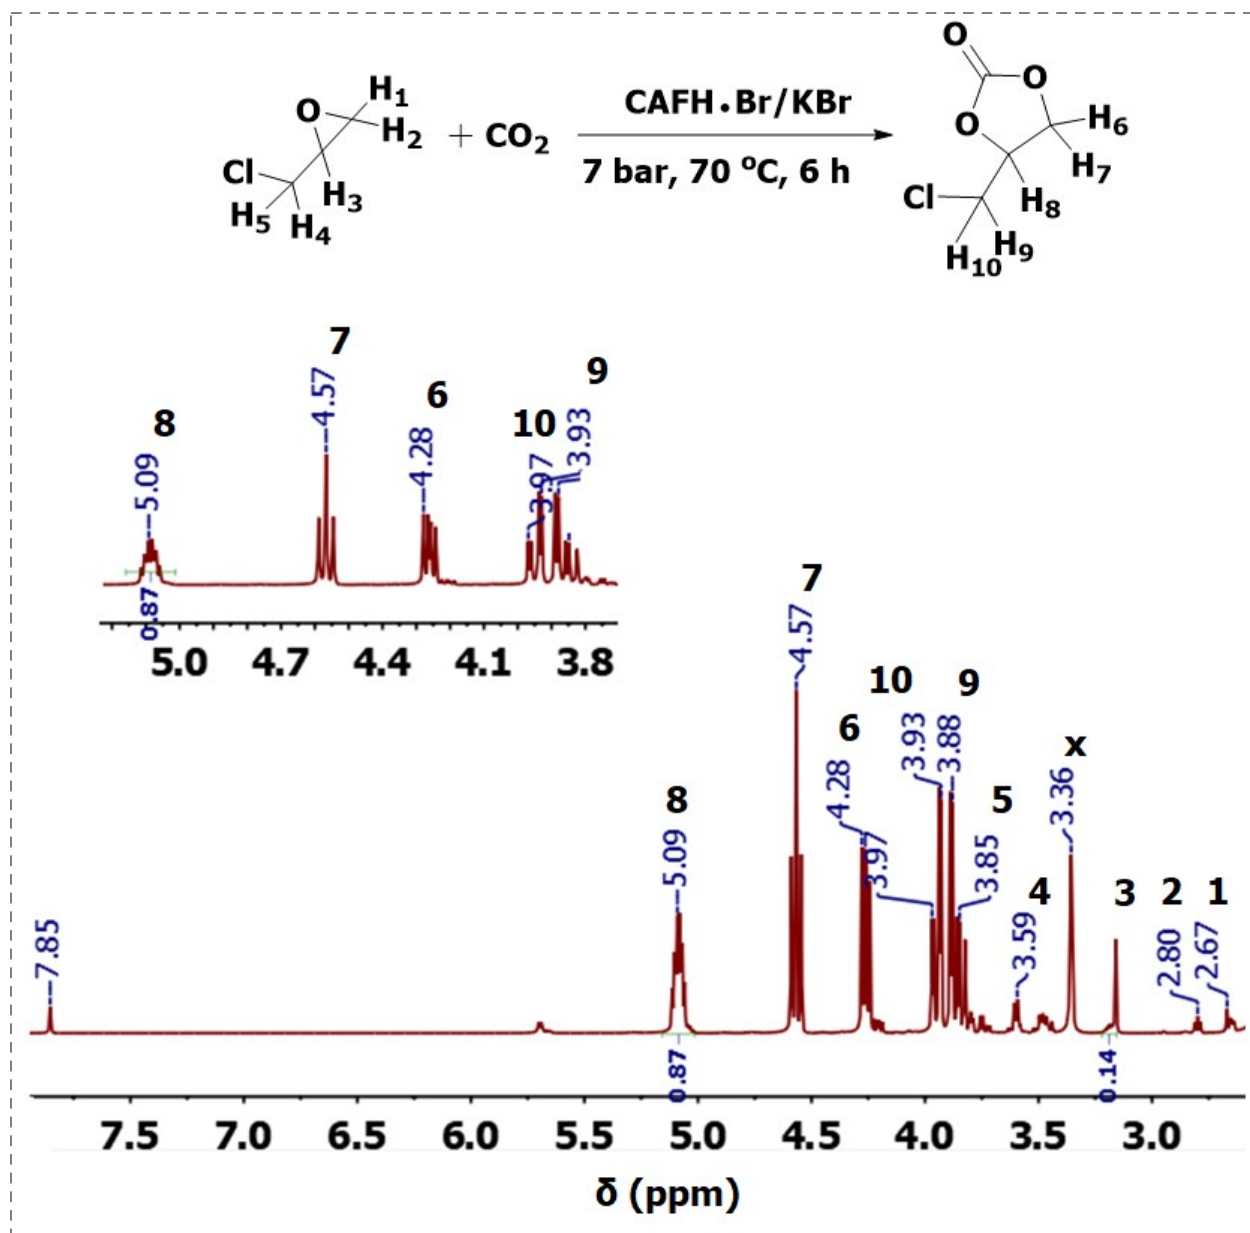

**Figure S21.** <sup>1</sup>H NMR spectrum of ECH conversion in DMSO-*d*<sub>6</sub> in CAFH·Br/KBr (1:1, Table 2, Entry 3).

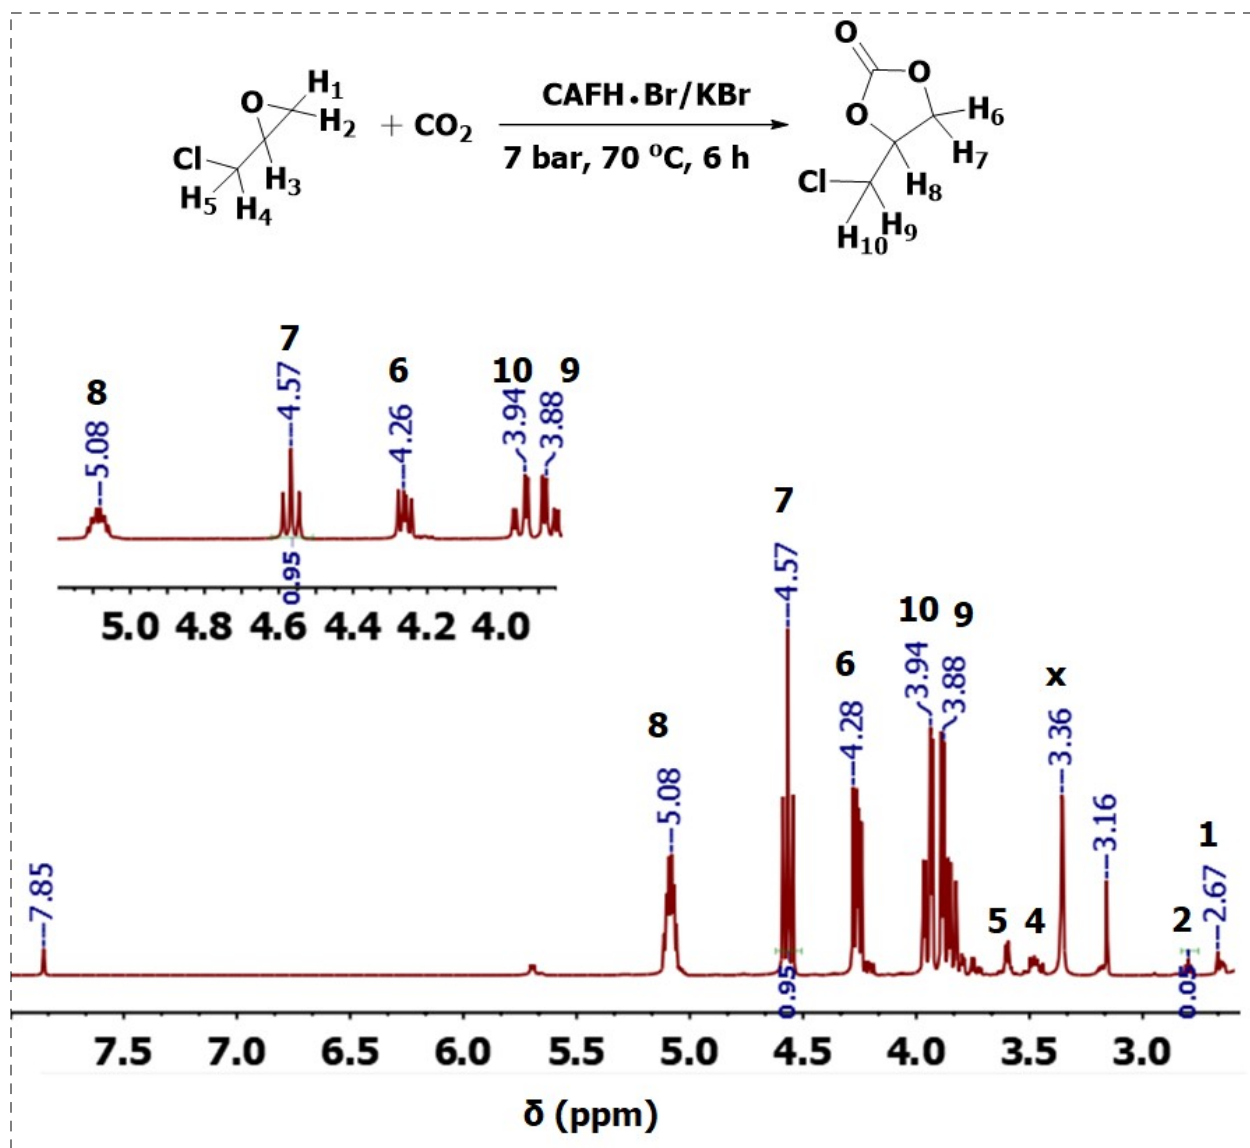

Figure S22. <sup>1</sup>H NMR spectrum of ECH conversion in DMSO-*d*<sub>6</sub> in CAFH·Br/KBr (1:2, Table 2, Entry 3).



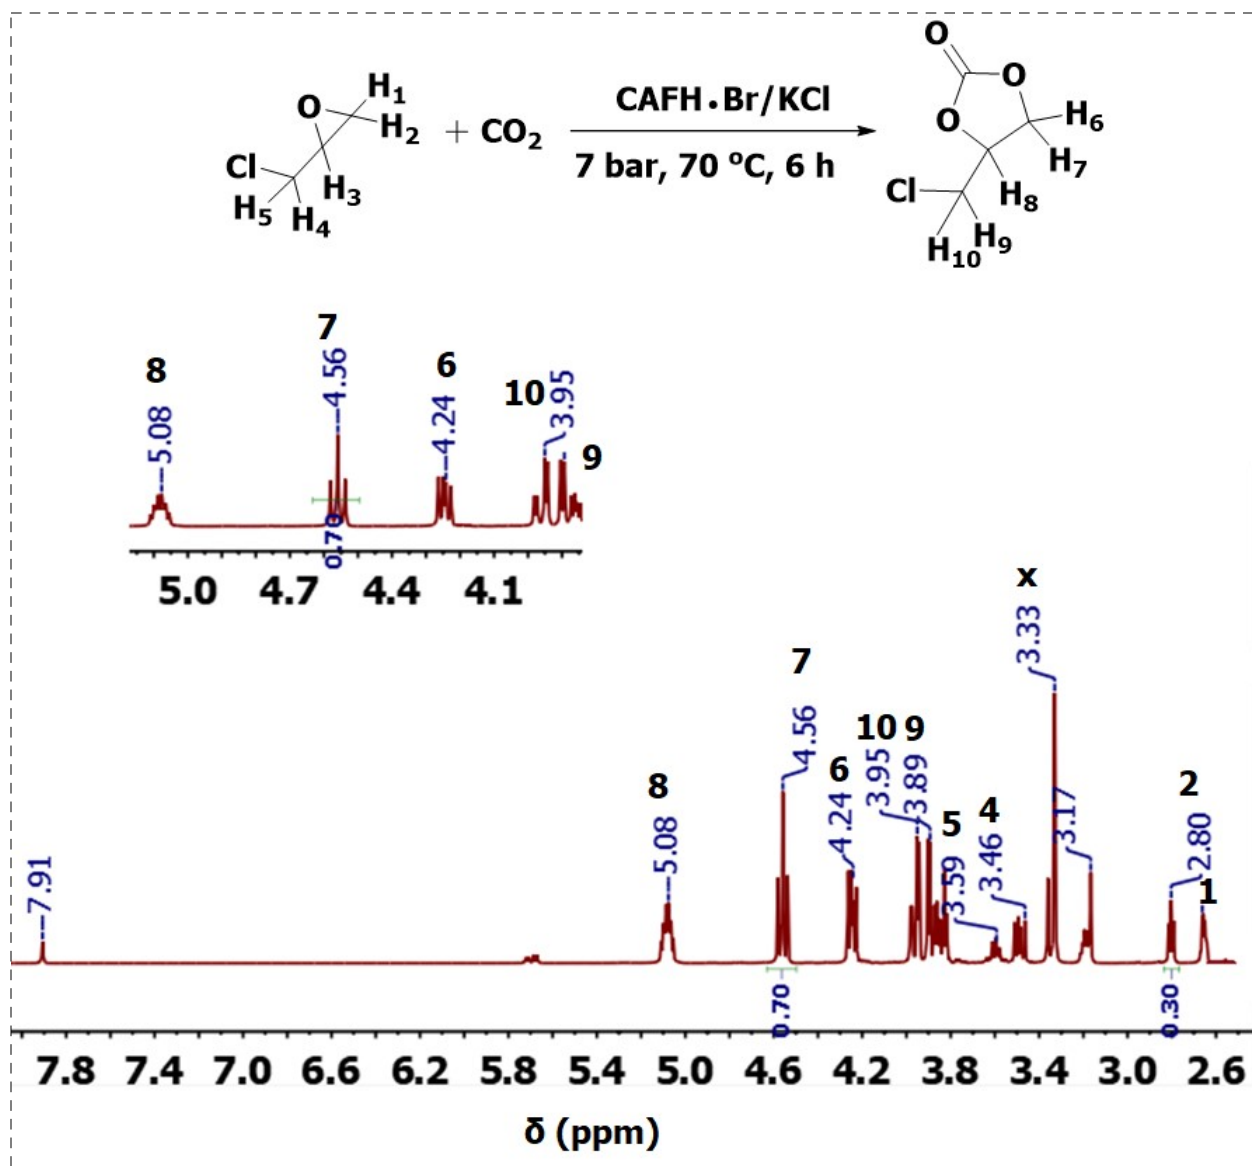

**Figure S23.** <sup>1</sup>H NMR spectrum of ECH conversion in DMSO-*d*<sub>6</sub> in CAFH·Br/KCl (1:1, Table 2, Entry 4).

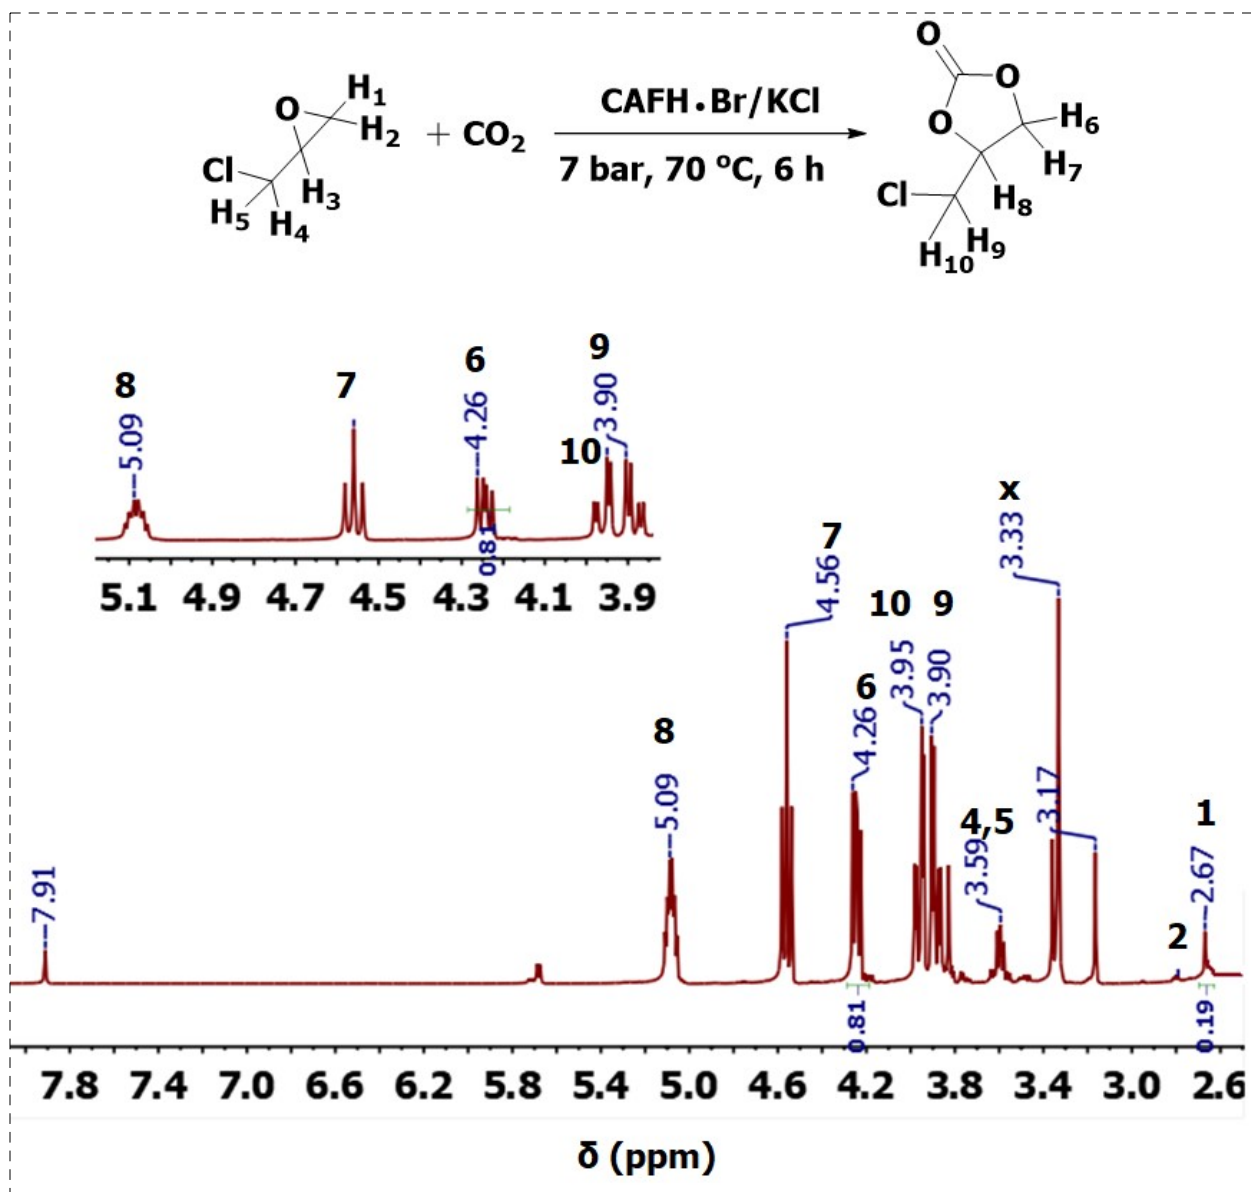

**Figure S24.** <sup>1</sup>H NMR spectrum of ECH conversion in DMSO-*d*<sub>6</sub>, x: water, in CAFH·Br/KCl (1:2, Table 2, Entry 4).

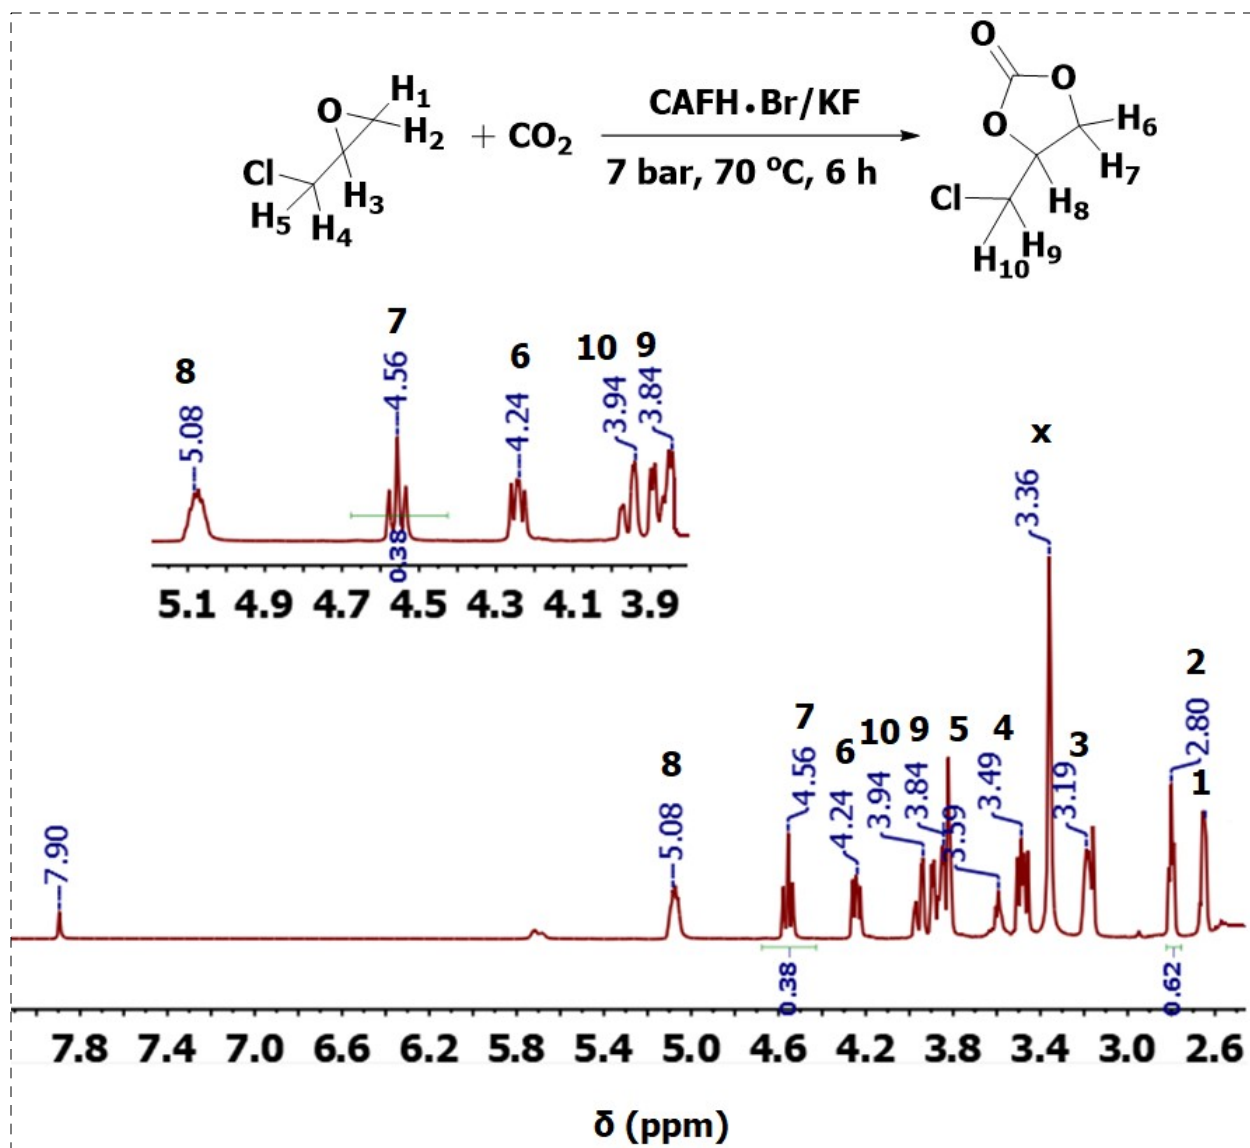

Figure S25. <sup>1</sup>H NMR spectrum of ECH conversion in DMSO-*d*<sub>6</sub>, x: water, in CAFH·Br/KF (1:1, Table 2, Entry 5).

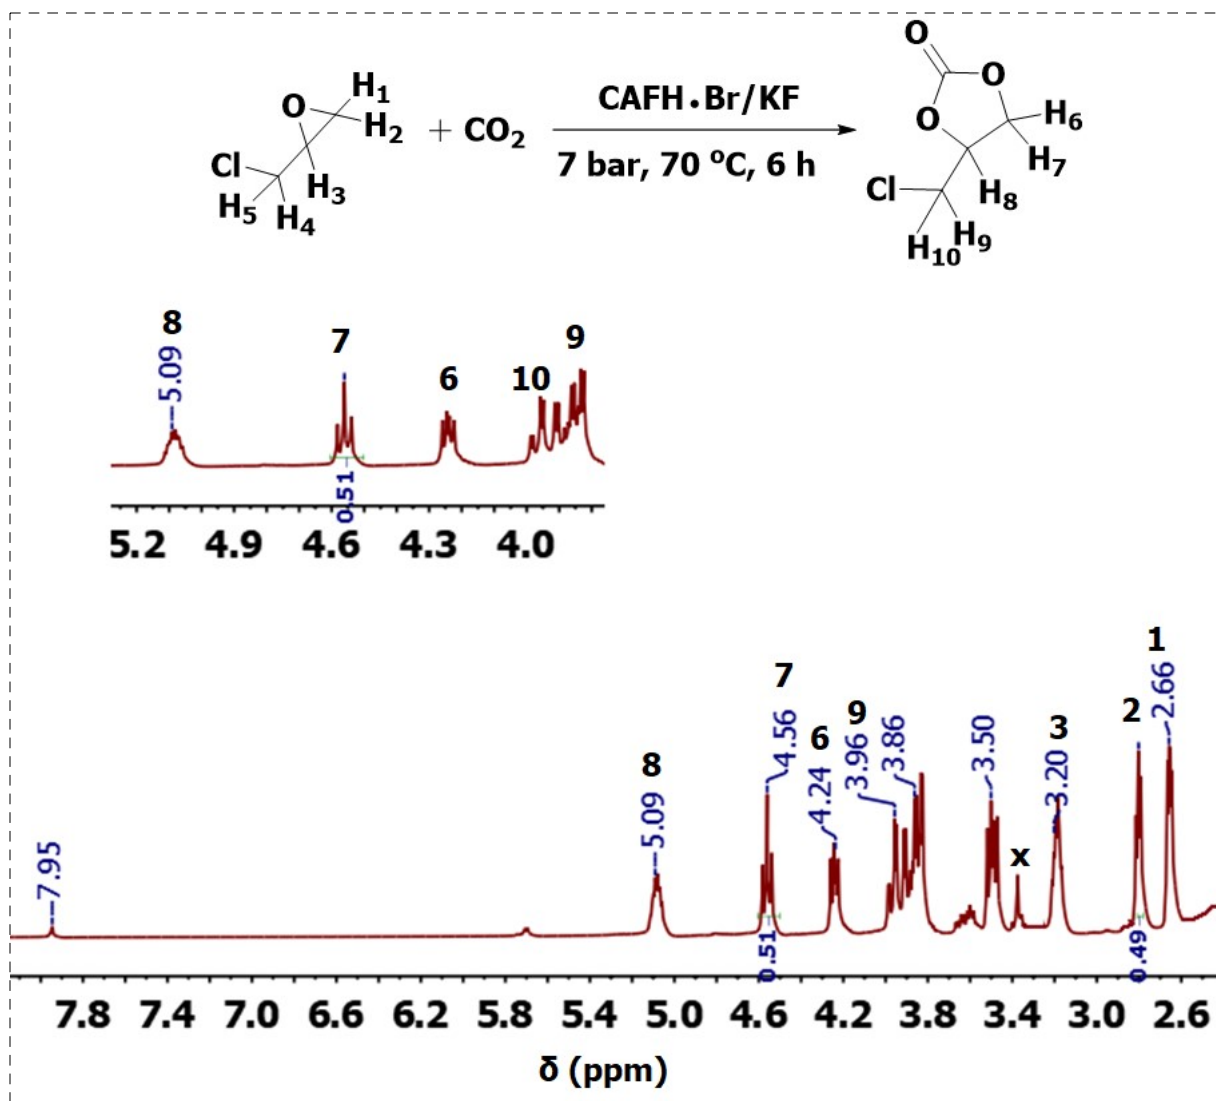

Figure S26.  $^1\text{H}$  NMR spectrum of ECH conversion in  $\text{DMSO}-d_6$ , x: water in  $\text{CAFH}\cdot\text{Br}/\text{KF}$  (1:2, Table 2, Entry 5).

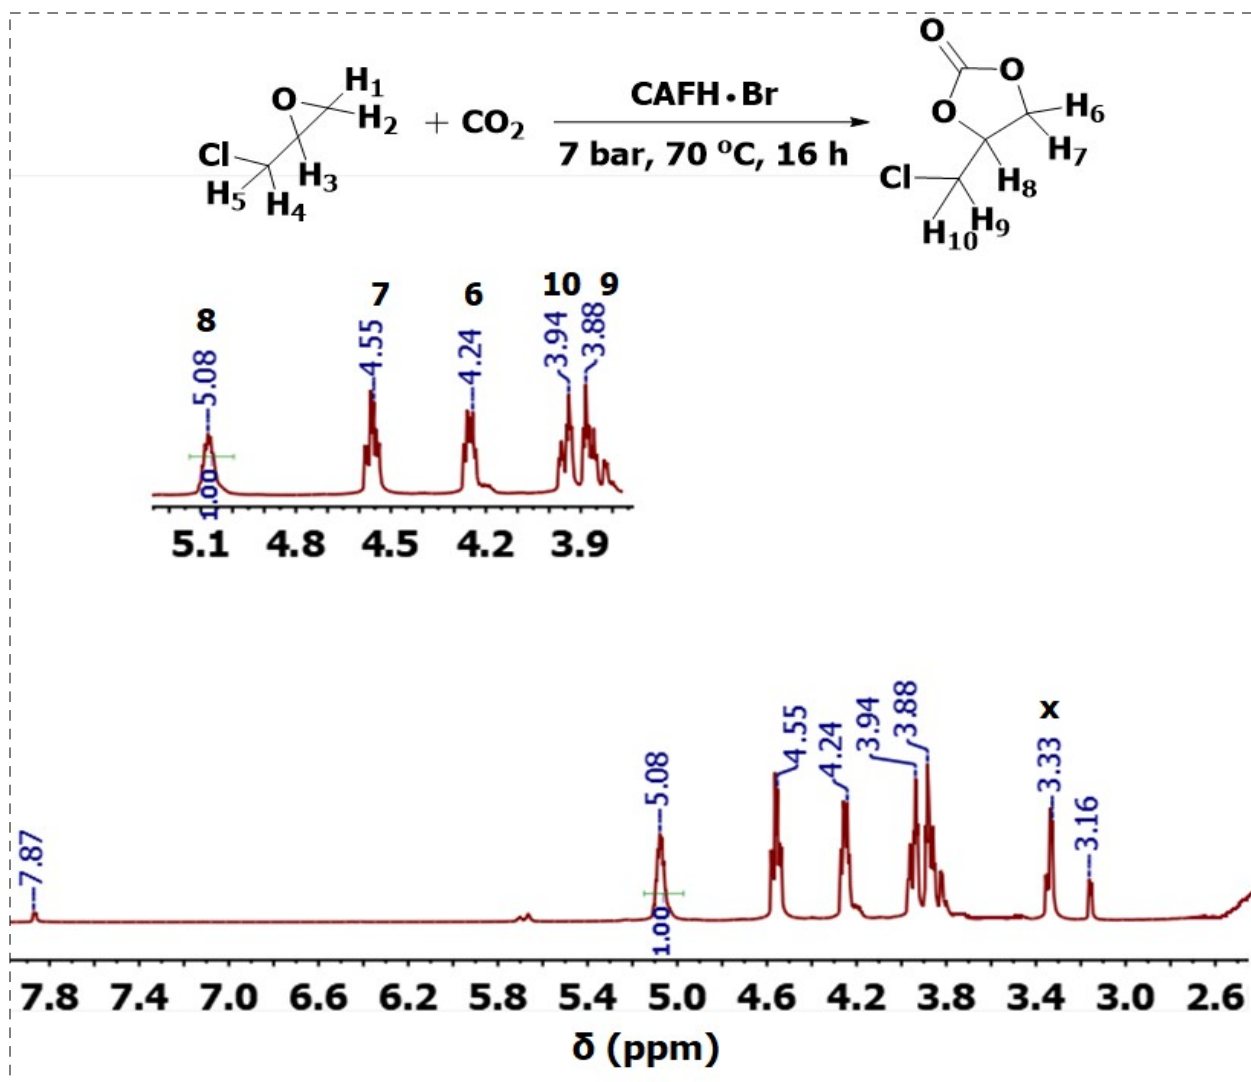

**Figure S27.** <sup>1</sup>H NMR spectrum of ECH conversion in DMSO-*d*<sub>6</sub> catalyzed by CAFH·Br, x: water, the peaks at 7.87 ppm corresponding to the catalyst (Table 3, Entry 1).

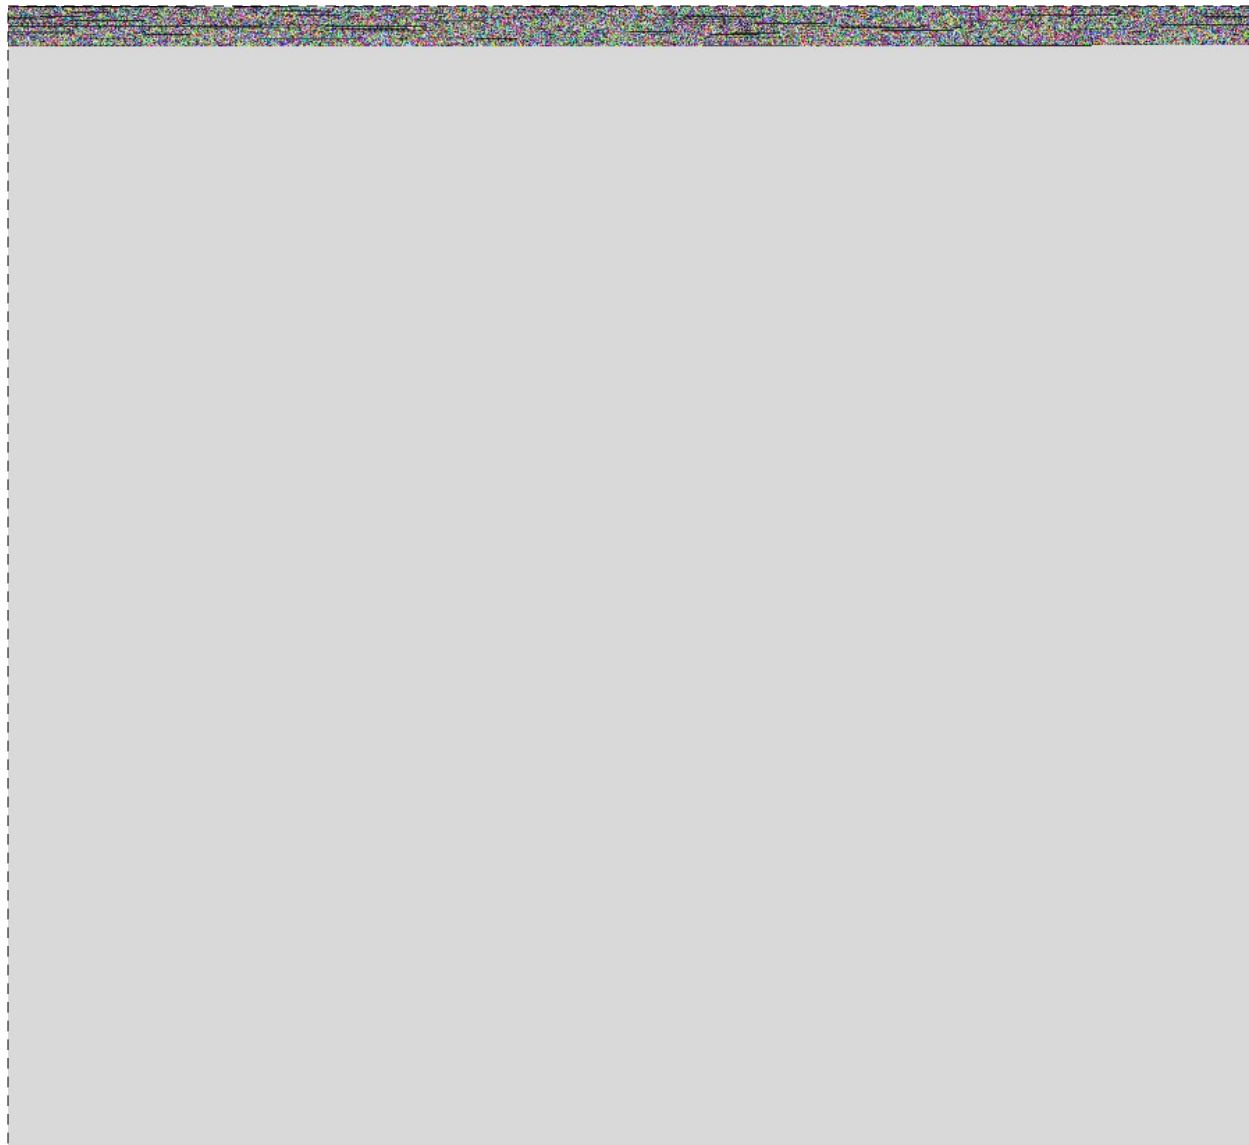

**Figure S28.**  $^1\text{H}$  NMR spectrum of ECH conversion in  $\text{DMSO-}d_6$  catalyzed by **CAFH•Br**/KI, x: water, the peaks at 7.87 ppm corresponding to the catalyst (**Table 3**, Entry 1).

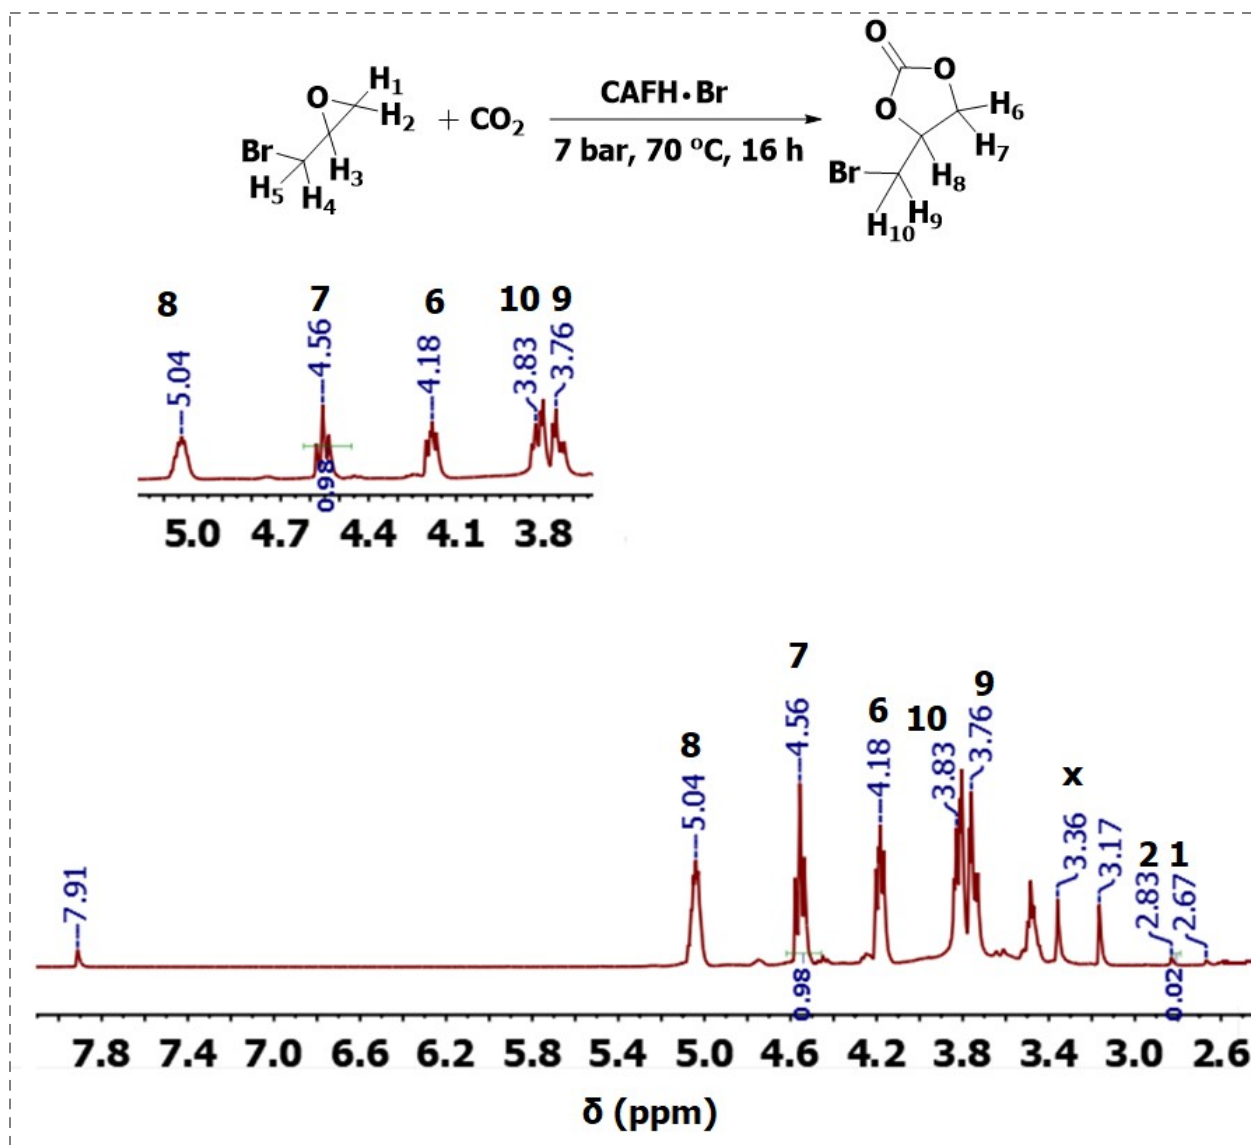

**Figure S29.** <sup>1</sup>H NMR spectrum of EBH conversion in DMSO-*d*<sub>6</sub> catalyzed by CAFH·Br, x: water, peaks at 3.17 and 7.91 ppm are corresponding to the catalyst (Table 3, Entry 2).

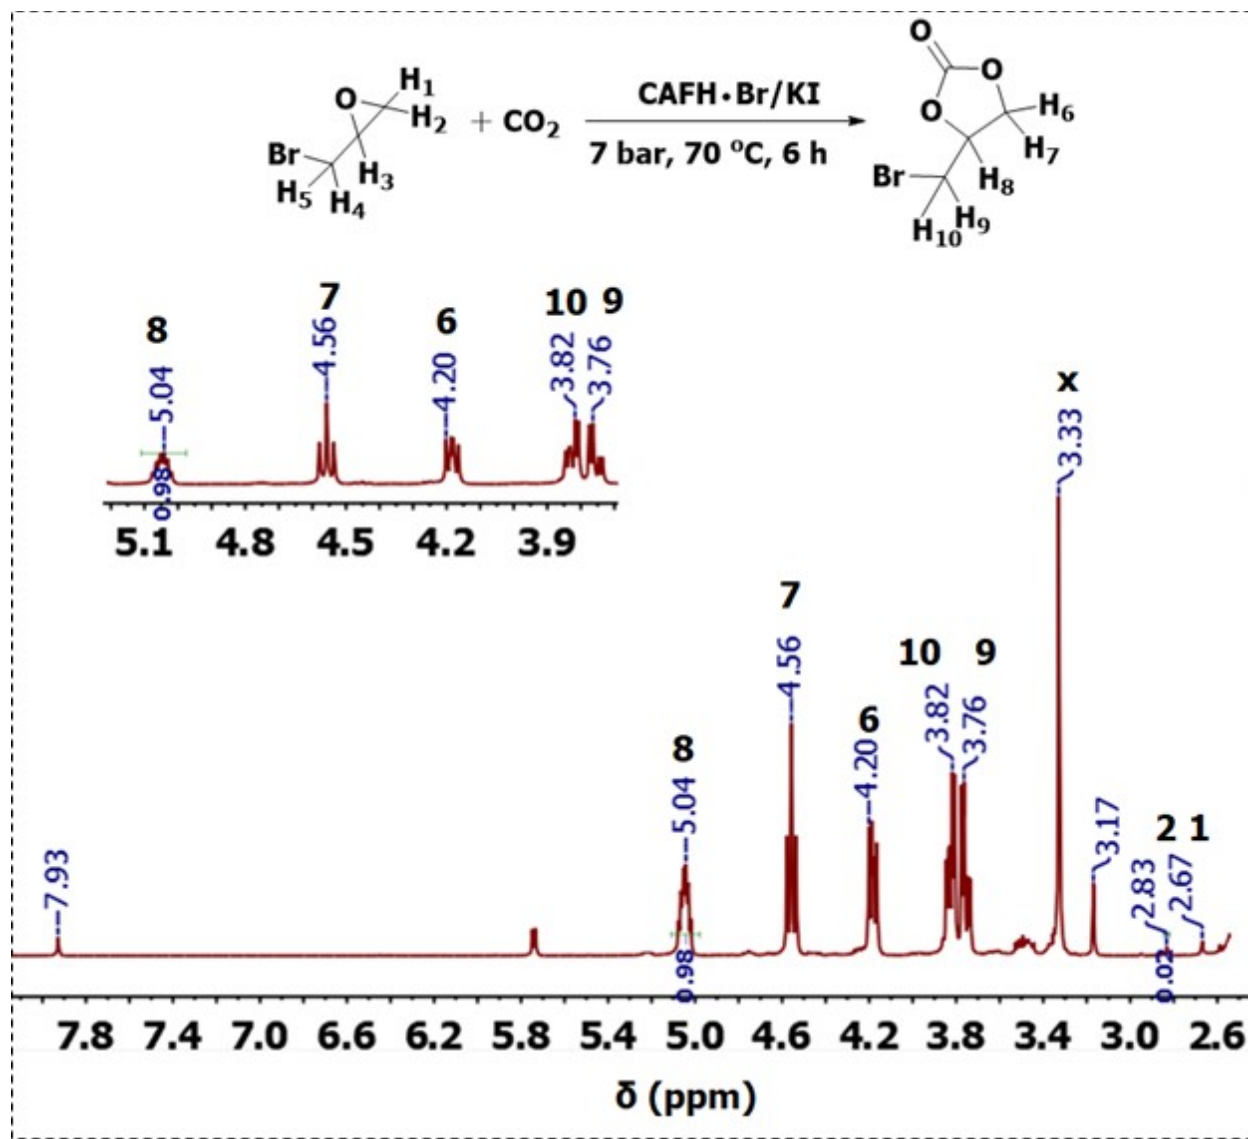

**Figure S30.**  $^1\text{H}$  NMR spectrum of EBH conversion in  $\text{DMSO}-d_6$  catalyzed by  $\text{CAFH}\cdot\text{Br}/\text{KI}$ , x: water, peaks at 3.17 and 7.93 ppm are corresponding to the catalyst (Table 3, Entry 2).



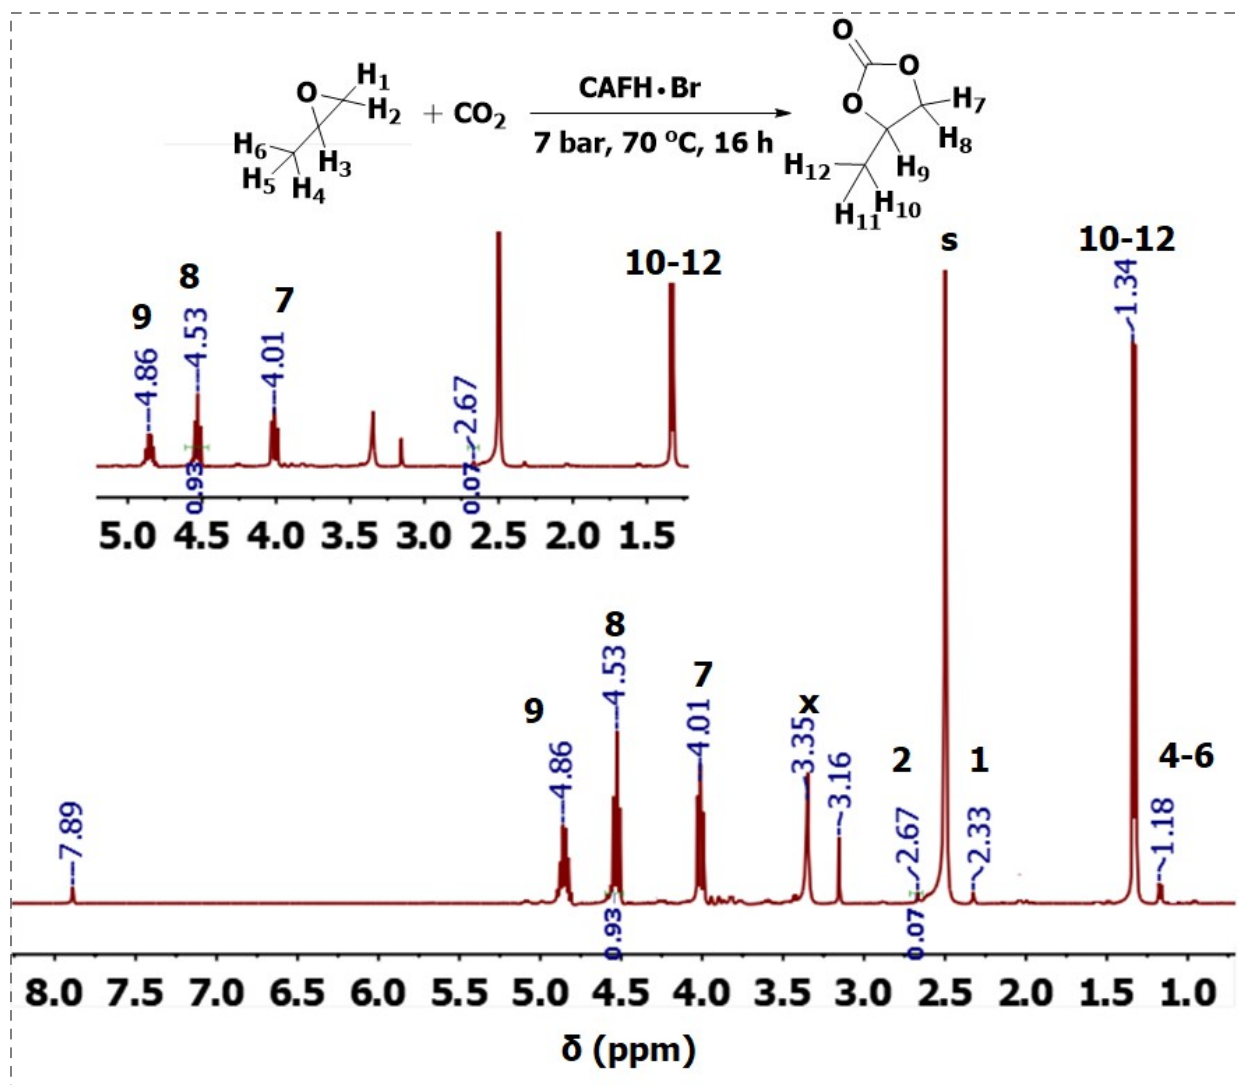

**Figure S31.** <sup>1</sup>H NMR spectrum of PO conversion in DMSO-*d*<sub>6</sub> catalyzed by CAFH•Br, s: solvent, x: water, peaks at 3.16 and 7.89 ppm are corresponding to the catalyst (Table 3, Entry 3).

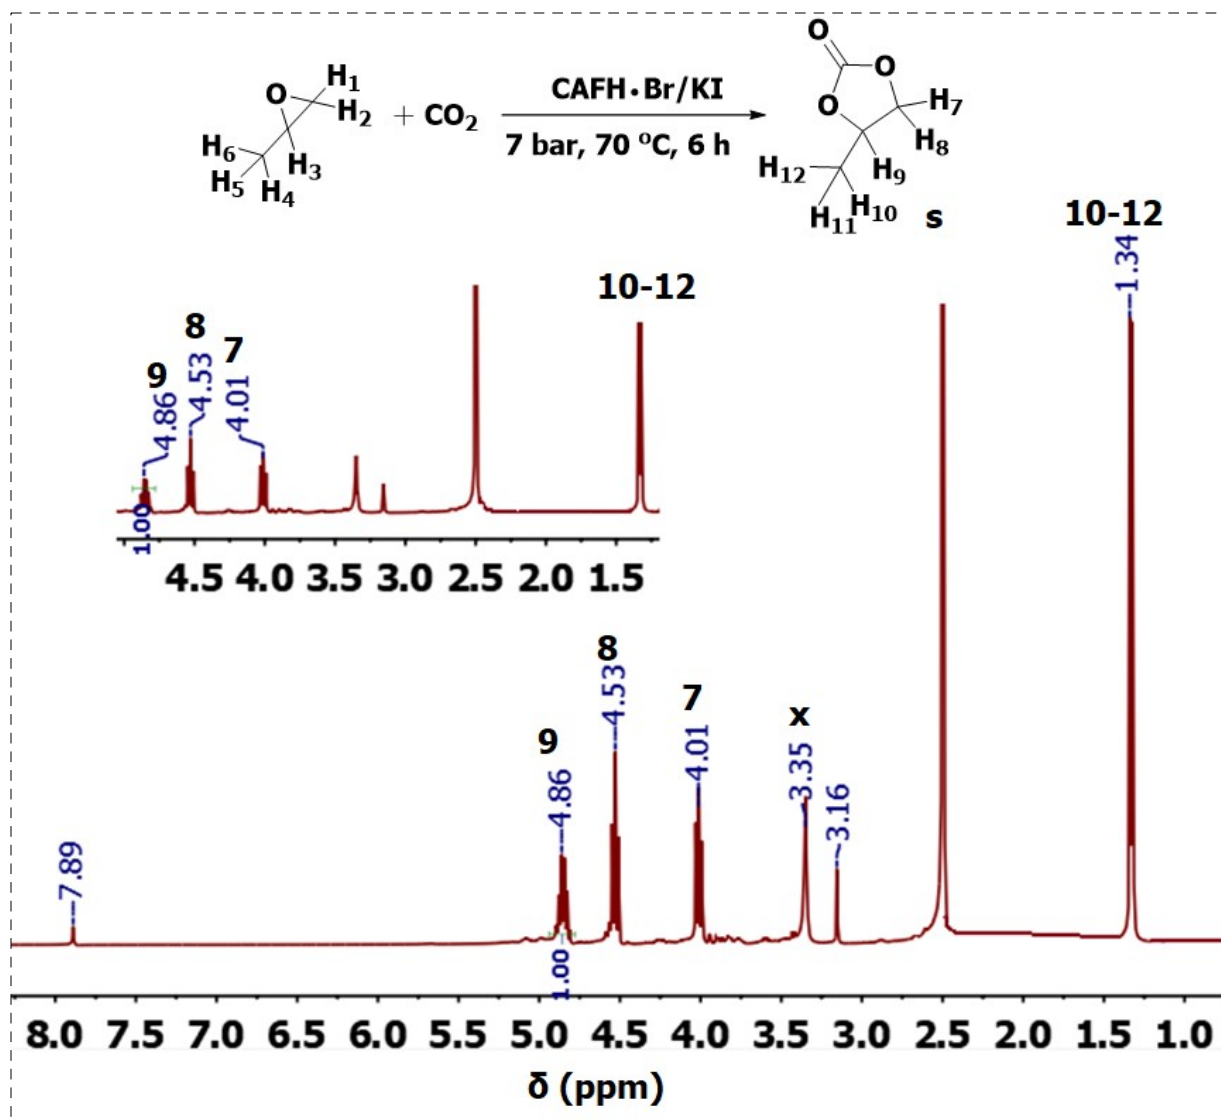

**Figure S32.** <sup>1</sup>H NMR spectrum of PO conversion in DMSO-d<sub>6</sub> catalyzed by CAFH•Br/KI, s: solvent, x: water, peaks at 3.16, 3.82 and 7.89 ppm are corresponding to the catalyst (Table 3, Entry 3).

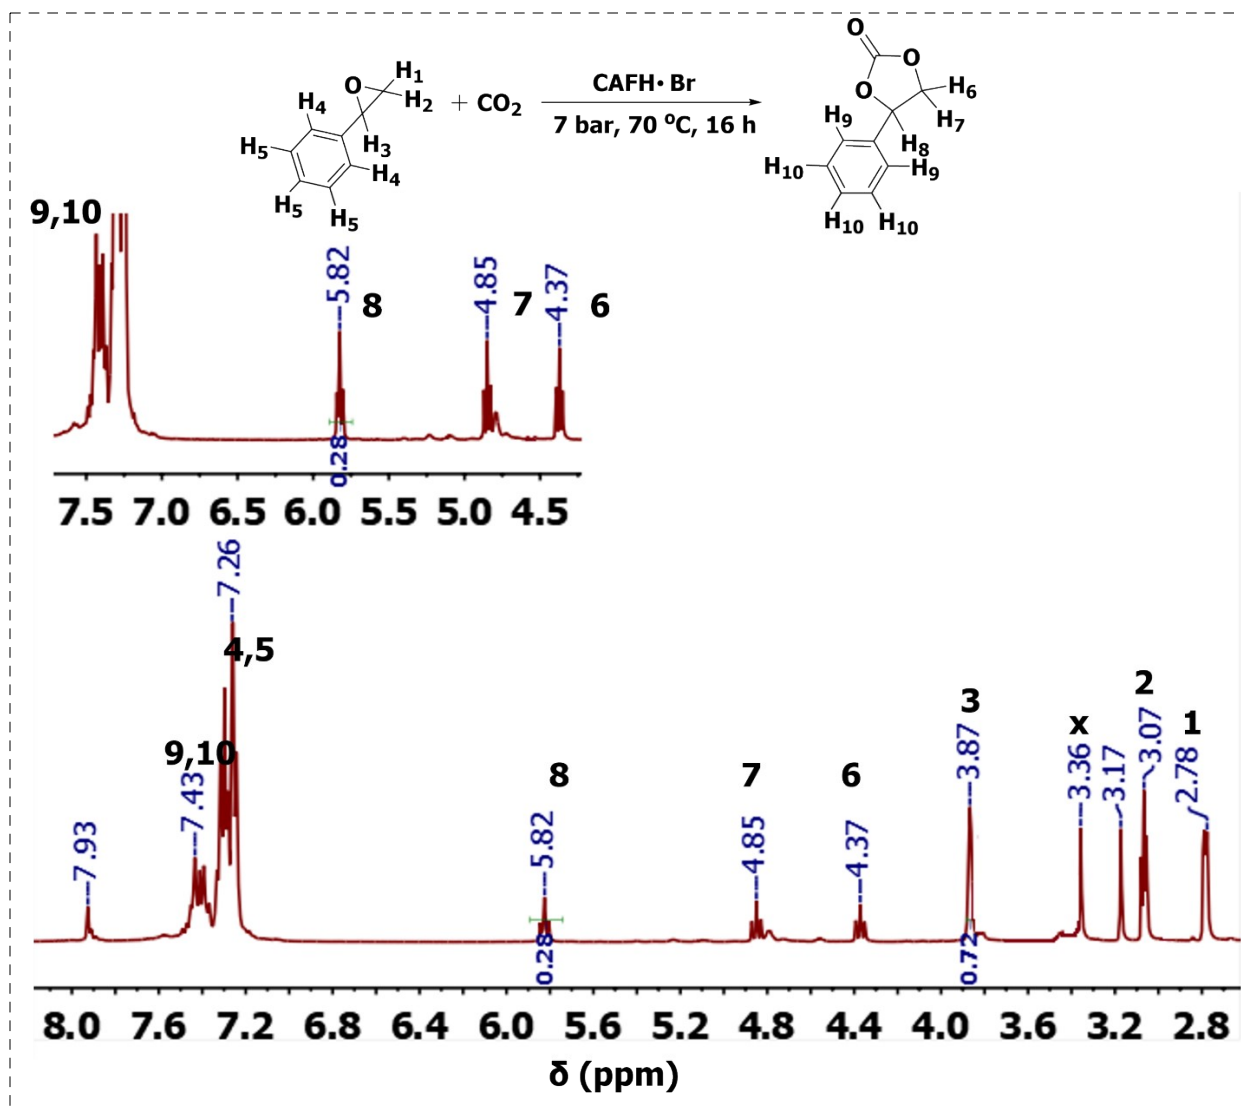

**Figure S33.**  $^1\text{H}$  NMR spectra of SO conversion in  $\text{DMSO-}d_6$  catalyzed by  $\text{CAFH}\cdot\text{Br}$ , x: water, peaks at 3.18 and 7.91 ppm are corresponding to the catalyst (Table 3, Entry 4).

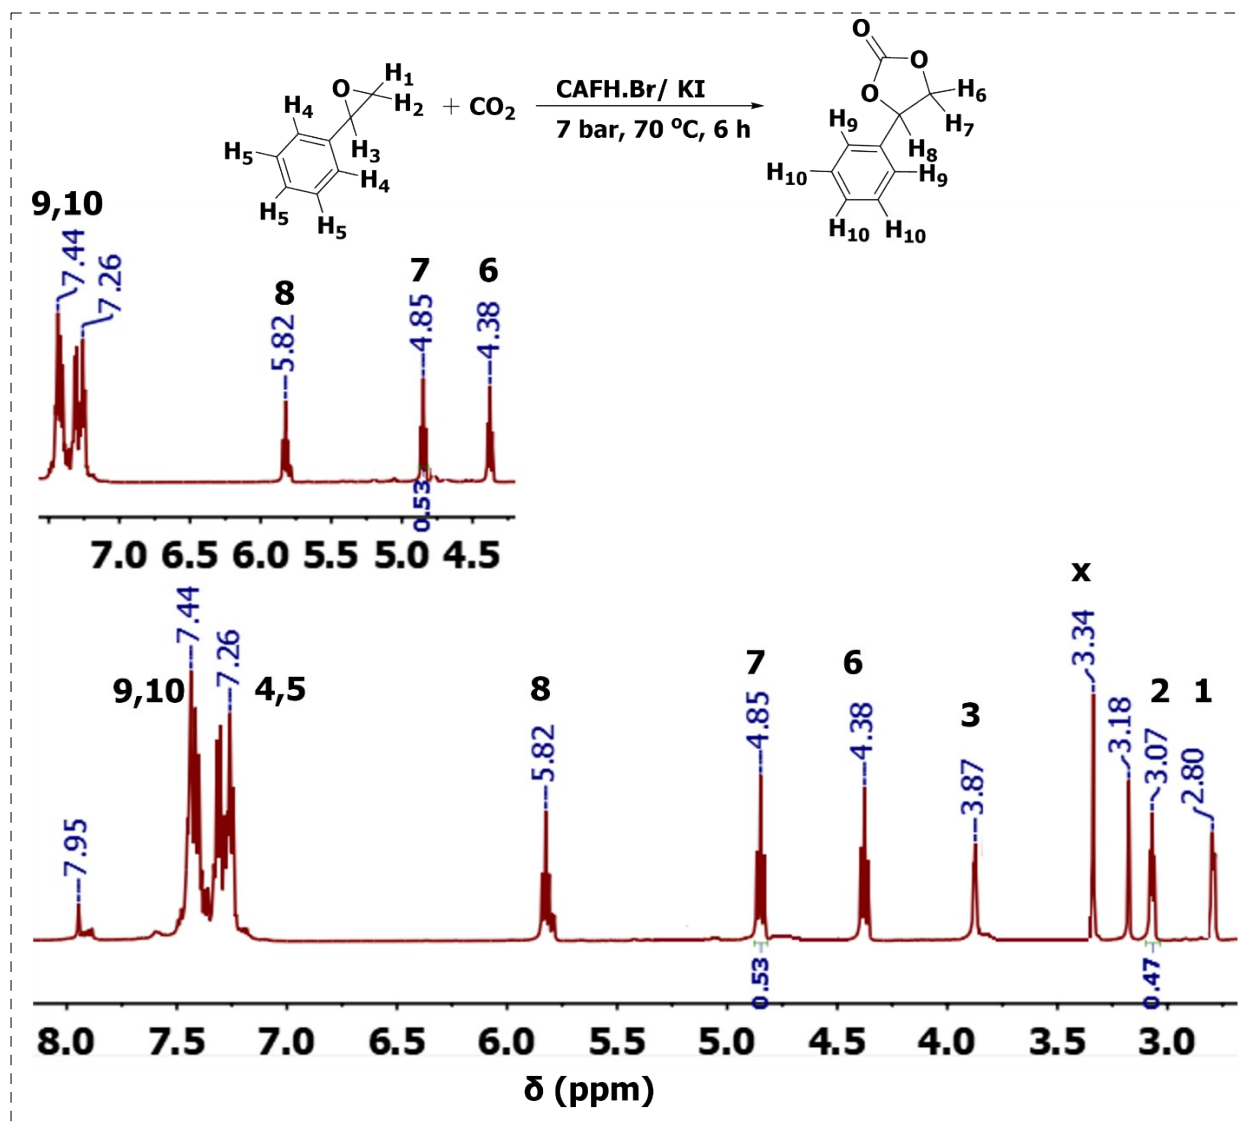

Figure S34. <sup>1</sup>H NMR spectrum of SO conversion in DMSO-*d*<sub>6</sub> catalyzed by CAFH•Br/KI, x: water, peaks at 3.17 and 7.93 ppm are corresponding to the catalyst (Table 3, Entry 4).

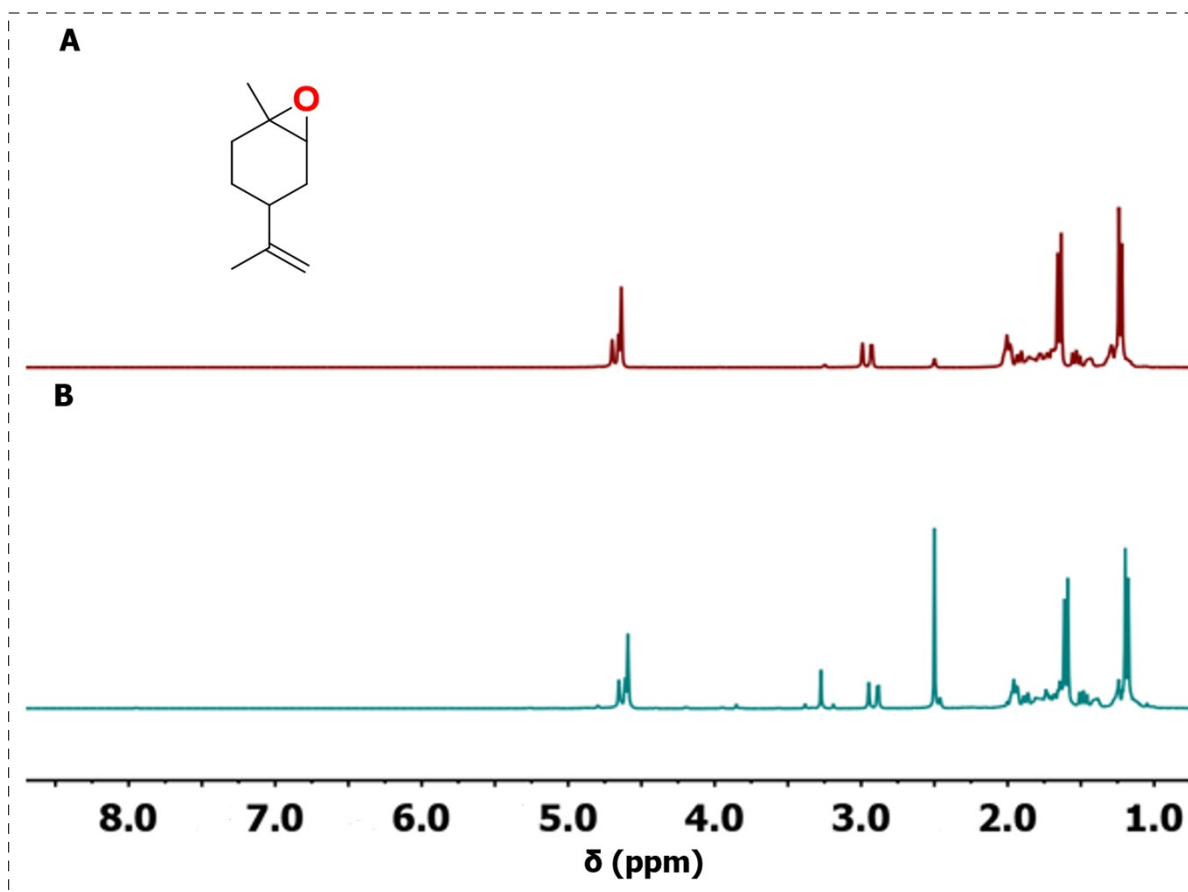

**Figure S35.**  $^1\text{H}$  NMR spectra in  $\text{DMSO-}d_6$  of: **A.** LO (maroon trace); **B.** LO coupled with  $\text{CO}_2$  (blue trace) in the presence of  $\text{CAFH}\cdot\text{Br}/\text{KI}$ . The cyclic carbonate peaks are not observed (Table 3, Entry 5).

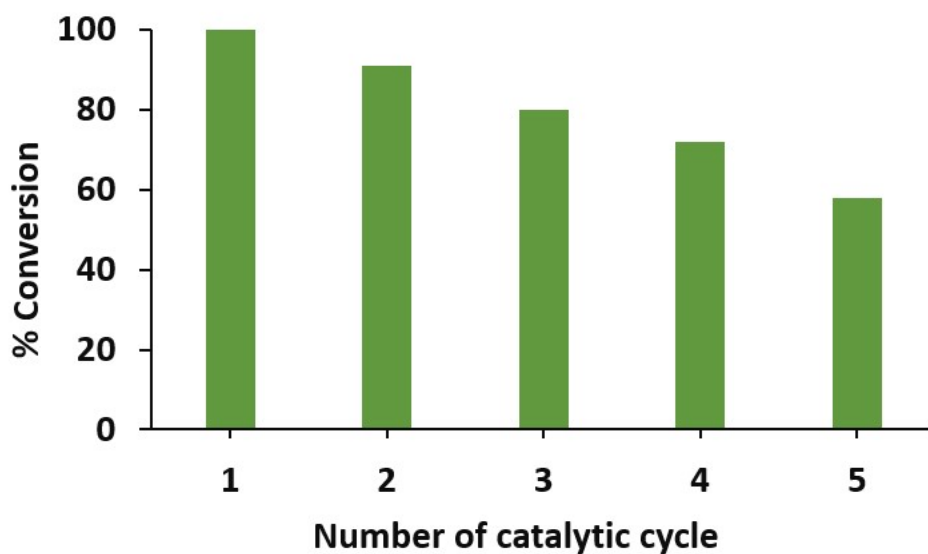

**Figure S36.** Reusability of CAFH•Br over five catalytic cycles. The linear decrease in catalytic activity was anticipated to losses during catalyst separation and filtration.

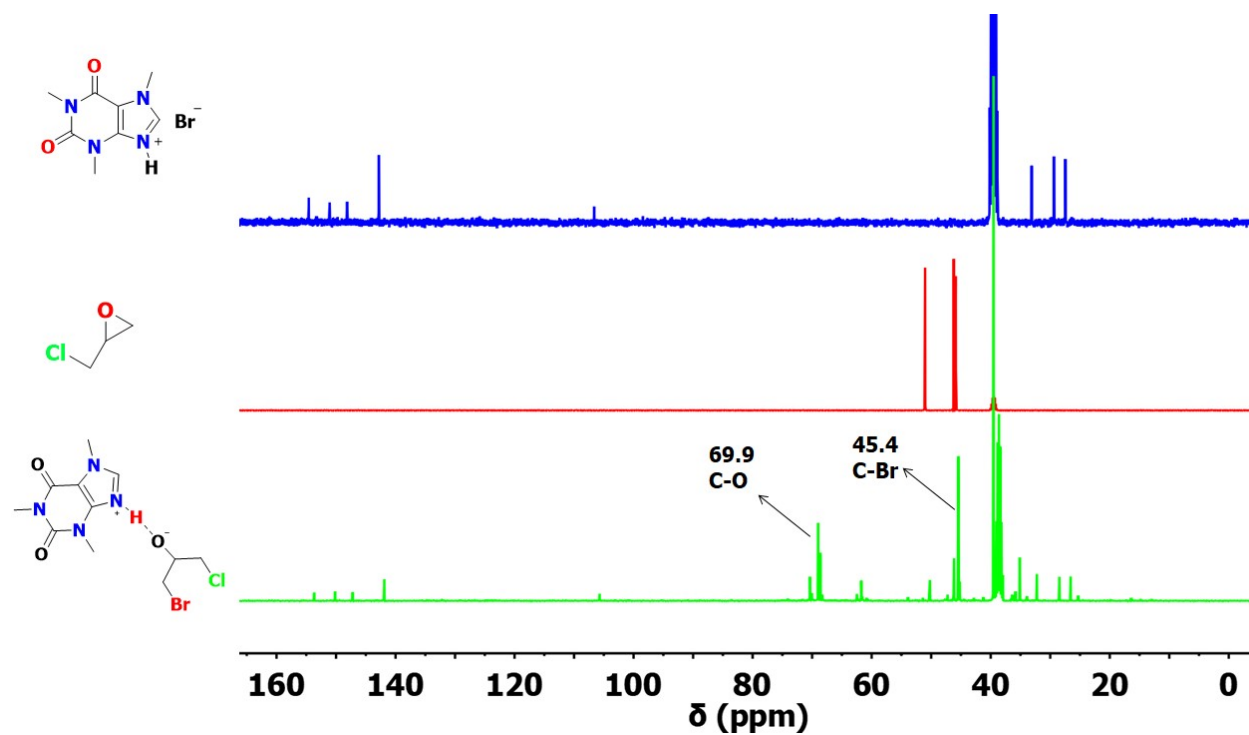

**Figure S37.** <sup>13</sup>C NMR spectra of CAFH•Br (blue trace), unreacted ECH (red traces), and CAFH•Br/ring opened ECH under N<sub>2</sub> atmosphere (green trace) in DMSO-*d*<sub>6</sub>.

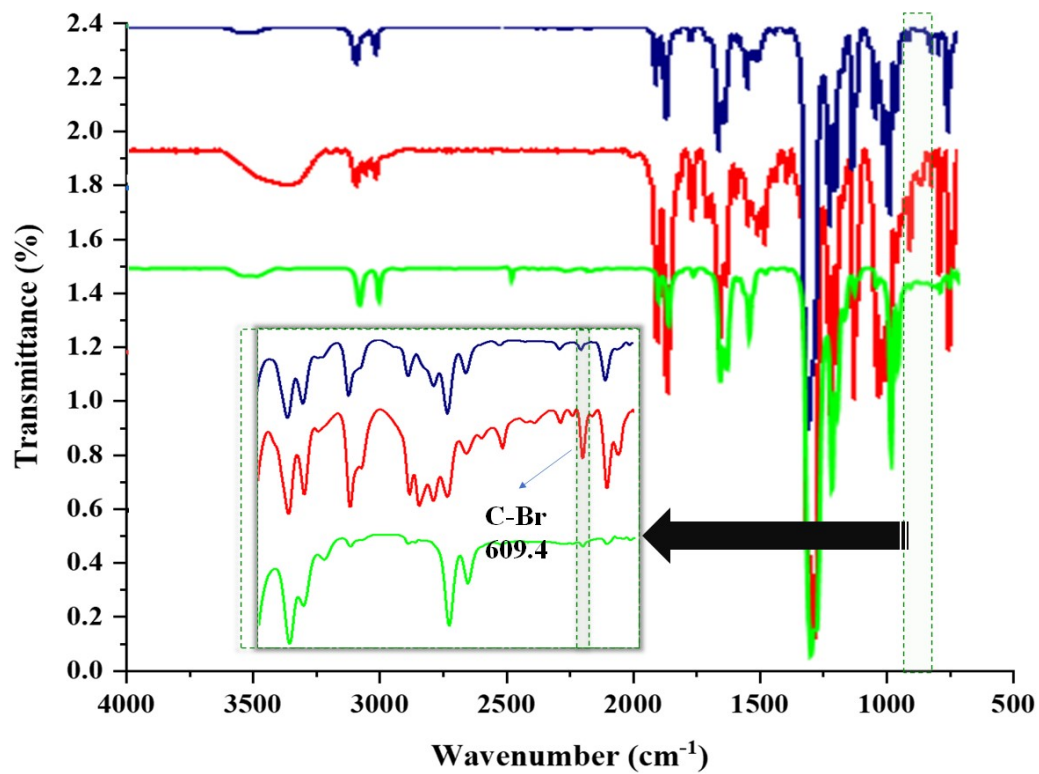

**Figure S38.** ATR-FTIR of the original mixture (blue traces), spectrum showed C-Br bond upon the alkoxide formation (red traces), spectrum showed C-Br bond disappearing upon bubbling with CO<sub>2</sub> (green traces).

## References

- 1 W.-M. Ren, Y. Liu and X.-B. Lu, *J. Org. Chem.*, 2014, **79**, 9771–9777.
- 2 S. Biswas, D. Roy, S. Ghosh and S. M. Islam, *J. Organomet. Chem.*, 2019, **898**, 120877.
